# 1 **SIX1 is a master regulator of the Rhabdomyosarcoma undifferentiated state**

2

3 Jessica Y. Hsu<sup>1,2</sup>, Etienne P. Danis<sup>1,10</sup>, Stephanie Nance<sup>8</sup>, Jenean O'Brien<sup>3</sup>, Veronica M. Wessells<sup>4</sup>, Andrew E.  
4 Goodspeed<sup>1,10</sup>, Jared C. Talbot<sup>5</sup>, Sharon L. Amacher<sup>6</sup>, Paul Jedlicka<sup>7</sup>, Joshua C. Black<sup>1,2</sup>, James C. Costello<sup>1,2,10</sup>,  
5 Adam D. Durbin<sup>8</sup>, Kristin B. Artinger<sup>9,10\*</sup>, Heide L. Ford<sup>1,2,10\*</sup>

6

7 1. Department of Pharmacology, University of Colorado Anschutz Medical Campus, Aurora, CO, USA

8 2. Pharmacology Graduate Program, University of Colorado Anschutz Medical Campus, Aurora, CO, USA

9 3. Department of Biology, College of St. Scholastica, Duluth, MN, USA

10 4. Division of Medical Oncology, University of Colorado Anschutz Medical Campus, Aurora, CO, USA

11 5. School of Biology and Ecology, University of Maine, Orono, ME, USA

12 6. Department of Molecular Genetics, Ohio State University, Columbus, OH, USA

13 7. Department of Pathology, University of Colorado Anschutz Medical Campus, Aurora, CO, USA

14 8. Division of Molecular Oncology, St. Jude Children's Research Hospital, Memphis, TN, USA

15 9. Department of Craniofacial Biology, University of Colorado Anschutz Medical Campus, Aurora, CO, USA

16 10. University of Colorado Cancer Center, University of Colorado Anschutz Medical Campus, Aurora, CO, USA

17 \*Correspondence: [heide.ford@cuanschutz.edu](mailto:heide.ford@cuanschutz.edu), [kristin.artinger@cuanschutz.edu](mailto:kristin.artinger@cuanschutz.edu)

18 Keywords: Rhabdomyosarcoma, SIX1, MYOD1, muscle differentiation, muscle progenitor, transcriptional control

19

## 20 **Highlights**

21 • FN-RMS are highly dependent on SIX1 for growth in both zebrafish and mouse xenograft  
22 models

23 • Loss of SIX1 alters the transcriptional landscape of RMS cells, inducing a growth to  
24 differentiation switch

25 • SIX1 knockdown in FN-RMS causes reduced super enhancer-based activity at stem-related  
26 genes and enhanced MYOD1 binding to differentiation loci, resulting in the activation of a  
27 myogenic differentiation program

28 • A gene signature derived from SIX1 loss strongly correlates with myogenic differentiation status  
29 and is predictive of advanced RMS.

30

31

## 32 **Summary**

33 Rhabdomyosarcoma (RMS) is a pediatric skeletal muscle sarcoma characterized by the expression of  
34 the myogenic-lineage transcription factors (TF) MYOD1 and MYOG. Despite high expression of these  
35 TFs, RMS cells fail to terminally differentiate, suggesting the presence of factors that alter their function.  
36 Here, we demonstrate that the developmental TF, SIX1, is highly expressed in RMS and is critical to  
37 maintain a muscle progenitor-like state. SIX1 loss induces terminal differentiation of RMS cells into  
38 myotube-like cells and dramatically impedes tumor growth *in vivo*. We show that SIX1 maintains the  
39 RMS undifferentiated state by controlling enhancer activity and MYOD1 occupancy at loci more  
40 permissive to tumor growth over terminal muscle differentiation. Finally, we demonstrate that a gene  
41 signature derived from SIX1 loss correlates with differentiation status in RMS and predicts RMS  
42 progression in human disease. Our findings demonstrate a master regulatory role for SIX1 in the  
43 repression of RMS differentiation via genome-wide alterations in MYOD1-mediated transcription.

44

45

46

47

48

49

50

51

52

53

54

55

56

## 57 Introduction

58 Rhabdomyosarcoma (RMS) is a soft tissue pediatric sarcoma with molecular and histological features  
59 that resemble undifferentiated skeletal muscle. The majority of pediatric RMS cases can be divided into  
60 two major subtypes: Embryonal RMS (ERMS) and Alveolar RMS (ARMS), which are designated based  
61 on their histology. While ERMS tumors are characterized by a variety of mutational events, notably  
62 *RAS* mutations, ARMS tumors are classically associated with *PAX3-FOXO1* or *PAX7-FOXO1*  
63 chromosomal rearrangements, which has led to the replacement of the histological annotations ERMS  
64 and ARMS with “Fusion-negative (FN)” and “Fusion-positive (FP)”. The distinct genetic perturbations  
65 associated with ERMS and ARMS have long implied that the RMS subtypes arise from distinct  
66 mechanisms, however a shared feature of all RMS tumors is their expression of the myogenic  
67 regulatory transcription factors (TF) *MYOD1* and *MYOG*, orchestrators of skeletal muscle differentiation  
68 with aberrant functions in RMS tumors<sup>1</sup>. Whereas in normal skeletal muscle differentiation these  
69 myogenic TFs coordinate the expansion, commitment, and eventual differentiation of embryonic  
70 mesodermal or myogenic progenitors, the expression of these myogenic TFs in RMS tumors is not  
71 coupled with exit from the cell cycle and differentiation into post-mitotic myofibers<sup>2</sup>. Several studies to  
72 date have discovered distinct activities of these myogenic transcription factors in the context of normal  
73 muscle development and RMS<sup>3-5</sup>. However, it remains less clear what factors cause these myogenic  
74 regulatory factors to depart from their canonical roles as drivers of muscle differentiation to instead  
75 maintain RMS cells as less differentiated muscle progenitors.

76

77 The *SIX1* homeodomain-containing TF belongs to the *Six* gene family that includes *SIX1-SIX6* in  
78 vertebrates. Early studies of the *SIX1* ortholog in drosophila, *sine oculis (so)*, placed the functions of the  
79 *Six* gene family in eye morphogenesis, as *so* mutants lack compound eye structures<sup>6</sup>. However, since  
80 the original discovery of *so*, the functions of the *Six* family genes are known to extend beyond the visual  
81 system in vertebrates. Notably, the mammalian orthologs *Six1* and *Six4* have conserved and

82 indispensable roles in embryonic skeletal muscle development and skeletal muscle regeneration. In  
83 mice, *Six1* deficiency alone causes reduced and disorganized muscle mass<sup>7</sup>, and further ablation of  
84 *Six1* and its ortholog *Six4* causes exacerbated craniofacial defects and severe muscle hypoplasia<sup>8</sup>. In  
85 both *Six1* and *Six1/Six4* deficient mouse models, the expression of the critical myogenic TFs *MYOD1*  
86 and *MYOG* is compromised in migrating hypaxial muscle, demonstrating that *Six1* and *Six4* are  
87 required for the activation of these myogenic TFs. In zebrafish, morpholino-mediated loss of *six1b* gene  
88 expression similarly causes reduced hypaxial muscle and impairment of *Pax7+* muscle stem cell  
89 proliferation during skeletal muscle repair<sup>9,10</sup>. Recently, genetic ablation of *six1a/six1b/six4a/six4b*  
90 paralogs in the zebrafish genome has additionally shown that compound loss of *six1/4* function causes  
91 complete loss of all migratory muscle precursors that generate hypaxial muscles such as the fin  
92 muscles, while leaving trunk muscle relatively unaffected<sup>11</sup>. These results align with previous  
93 observations that morpholino-mediated loss of *six1a* and *six1b* also affect hypaxial muscles, though the  
94 muscle defects observed in the morpholino studies are more severe than those seen in the *six1a/six1b*  
95 genetic mutant<sup>9-11</sup>. These studies demonstrate that *Six1*, which acts in concert with *Six4*, lies upstream  
96 of the myogenic specification gene regulatory network and is a necessary component of the skeletal  
97 muscle circuit.

98

99 Myogenic differentiation is tightly governed by a cascade of myogenic regulatory factor (MRF)  
100 expression which encompass the highly conserved class II basic helix-loop-helix (bHLH) TFs *MYOD1*,  
101 *MYF5*, *MYOG*, and *MRF4*. During the course of embryonic development as well as skeletal muscle  
102 repair and regeneration, these four MRFs are considered necessary for committing progenitor cells to  
103 the skeletal muscle lineage, expanding the progenitor cell pool, and differentiating committed cells into  
104 contractile muscle fibers<sup>12</sup>. While structurally the MRF family is conserved, the transition of muscle  
105 progenitors from commitment, to growth, and subsequently to differentiation invokes sub-functionalized  
106 and context-specific roles of these MRFs. Indeed, *MyoD1* can activate distinct myoblast-specific and  
107 differentiation-specific gene expression programs by modifying chromatin environments that facilitate



108 either differentiation or myoblast growth<sup>13,14</sup>. Because the functions of *MYOD1* are co-opted in RMS  
109 tumors to foster growth rather than to promote differentiation, we hypothesized that other factors critical  
110 for normal skeletal muscle development must repress the differentiation subprograms of *MYOD1*.  
111 Given the well-established role of *SIX1* in regulating upstream activities of *MYOD1* as well as other  
112 MRFs to induce skeletal muscle development<sup>8,10,15-17</sup>, we investigated the molecular role of *SIX1* in  
113 regulating RMS tumor growth. Here, we report that *SIX1* loss causes a growth-to-differentiation switch  
114 in RMS cells by globally regulating a myogenic transcriptional program and reinstating the function of  
115 *MYOD1* as a driver of skeletal muscle differentiation.

116

## 117 Results

### 118 ***SIX1* is overexpressed and predicted to be an essential gene in Rhabdomyosarcoma**

119 To examine whether *SIX1* is highly expressed in human RMS, we interrogated its expression in publicly  
120 available large RMS RNAseq datasets. In multiple independent datasets, high *SIX1* mRNA expression  
121 could be detected, both compared with other sarcomas in the National Cancer Institute Oncogenomics  
122 pan-sarcoma dataset (Suppl Fig. 1A) and the St. Jude Pediatric Cancer Genome Project (Suppl Fig.  
123 1B), and compared with normal tissues in the St. Jude Integrated Rhabdomyosarcoma Database (iRDb)  
124 (Fig 1A). Notably, *SIX1* was more highly expressed in RMS samples, compared with differentiated  
125 skeletal muscle controls depicting different stages of skeletal muscle development (Fig 1A). To confirm  
126 these data, we next assessed *SIX1* protein expression in an RMS tumor tissue array consisting of 96  
127 human RMS patient samples and 8 normal skeletal muscle controls (Figure 1B-C). Using a 1-4 scoring  
128 system of nuclear immunohistochemical staining, we detected strong nuclear *SIX1* staining in the  
129 ERMS/Fusion-Negative and ARMS/Fusion-Positive tumor sections (18% and 29% with IHC staining  
130 scores  $\geq 2$ , respectively) compared to normal skeletal muscle control sections (0% with IHC staining  
131 score  $\geq 2$ ) (Figure 1B-C). To further determine if *SIX1* has a functional role in RMS, we next examined  
132 data from the Broad and Sanger Institutes' exome-wide CRISPR-Cas9 knockout (KO) screening

133 dataset<sup>18</sup>. In the 869 cell lines tested in the CRISPR-Cas9 screen, we observed that the 10 RMS cell  
134 lines used in the screen exhibited both high SIX1 mRNA expression and high SIX1 gene dependency  
135 (Figure 1D). Further comparison of the RMS tumor cell lines against all other tumor cell lines  
136 demonstrates that SIX1 is a selective dependency in RMS and is required for RMS cell survival ( $q$ -  
137 value = 0.018), as is the myogenic TF MYOD1 (Figure 1E).

138

139 Given the high expression of SIX1 in RMS tumors compared with matched normal tissues, we  
140 hypothesized that the increased SIX1 expression in RMS tumors compared with normal muscle could  
141 aberrantly activate its developmental functions in this cancer context. To investigate SIX1 function in  
142 RMS, we examined the expression of SIX1 in a panel of human RMS cell lines and detected high SIX1  
143 expression in both FN and FP RMS cell lines (Figure 1F). Although SIX1 expression is high in both FP  
144 and FN-RMS, we focused our studies on the FN subtype to interrogate its functions outside the context  
145 of the *PAX3-FOXO1* fusion. Using two FN-RMS cell lines (SMS-CTR and RD) that highly express SIX1,  
146 we sought to validate the CRISPR-Cas9 screen findings using an orthogonal method. We thus  
147 established SMS-CTR and RD cell lines transduced with shRNAs targeting either no coding sequence  
148 in the genome (shScramble) or two distinct SIX1 sequences (SIX1 KD5, SIX1 KD6) (Figure 1G). In both  
149 cell lines, we observed that reduced levels of SIX1 were paired with deficits in cell growth and mitotic  
150 activity as measured by IncuCyte live-cell growth assays (Figure 1H) and the mitotic marker phospho-  
151 histone H3 (pH3) staining, respectively (Figure 1I). Together, these data demonstrate that SIX1 is  
152 highly expressed and required for the growth of RMS cells *in vitro*.

153

#### 154 ***six1b* is required for zebrafish RMS tumor growth**

155 Given the above *in vitro* observations, we sought to examine the role of SIX1 in an *in vivo* setting, first  
156 using a zebrafish model of ERMS (zRMS) induced by the co-injection of *rag2-kRASG12D* and *rag2-*  
157 *GFP* transgenes into the single-cell stage of the zebrafish<sup>19</sup>. This model results in the generation of  
158 skeletal muscle tumors with histological features similar to human FN-RMS, and parallels our cell line

159 data, as SMS-CTR and RD cells are both *RAS*-mutated FN-RMS<sup>20,21</sup>. To examine the expression of the  
160 two zebrafish *six1* paralogs, *six1a* and *six1b*, in zRMS tumors, we performed quantitative real-time PCR  
161 (qRT-PCR) analysis and found that *six1b* was significantly upregulated in zRMS tissue compared to  
162 age-matched normal skeletal muscle (Figure 2A), which was confirmed using RNA *in-situ* hybridization  
163 (ISH) (Figure 2B). To determine whether *six1b* was required for RMS tumor growth *in vivo*, we then  
164 combined the zRMS injection model with zebrafish carrying genetic loss-of-function alleles for only  
165 *six1b*<sup>11</sup>, both because of its more consistent overexpression in zRMS, and because the *six1a*;*six1b*  
166 double mutant fails to survive to adult stages when zRMS tumors would typically form<sup>11,19</sup>. In contrast,  
167 *six1b* mutants develop normally and are therefore a suitable model to test the function of reduced *six1*  
168 levels in RMS *in vivo*. Consistent with our previous findings, we found no differences in *pax3a*, *myod1*  
169 or *myogenin* expression between wildtype and *six1b* mutant sibling embryos from the 5-20+ somite  
170 stages (Suppl Fig 2A-C)<sup>11</sup>.

171

172 To determine whether *six1b* loss is sufficient to alter *kRAS*-mediated zRMS tumorigenesis, we injected  
173 *rag2-kRASG12D/GFP* transgenes<sup>19</sup> into the progeny of *six1b*<sup>+/-</sup> breeding pairs to generate age-matched  
174 sibling groups with all possible *six1b* genotypes. Interestingly, while GFP positivity could be detected in  
175 all genotypes, the progression to overt tumors was largely lost with *six1b* depletion (Figure 2C-E).  
176 Following tumor initiation, however, we observed that tumors established in *six1b*<sup>-/-</sup> zebrafish grew  
177 significantly slower over a 120-day time course, as compared to tumors established in wildtype siblings  
178 (Figure 2C-D). Reflecting this reduced growth rate, *six1b*<sup>-/-</sup> tumors were smaller in size compared to that  
179 of wildtype siblings' tumors at their final collection time-point at 120 dpf (Figure 2E).  
180 Immunohistochemical staining of tumors demonstrated that while wildtype tumors displayed normal  
181 architecture of RMS, *six1b*<sup>-/-</sup> tumor cells displayed more elongated morphology with higher cytoplasmic  
182 to nuclear ratios, reminiscent of skeletal muscle differentiation (Figure 2F). In alignment with the slow  
183 growth rate, staining for pH3 in *six1b*<sup>-/-</sup> (*n* = 3) tumors trended toward lowered intensity when  
184 compared to prominent pH3-positive staining in wildtype zRMS tumors (*n* = 4). This downward shift

185 did not reach statistical significance ( $p=0.081$ ) likely due to the to the small number of *six1b*<sup>-/-</sup> tumors  
186 that formed and were evaluable. Nevertheless, the reduction in GFP+ tumor growth in the *six1b*<sup>-/-</sup>  
187 zebrafish indicate that *six1b* plays a critical role in zRMS tumor progression at least in part via  
188 controlling RMS tumor cell proliferation.

189

### 190 **SIX1 knockdown inhibits human RMS tumor growth and progression**

191 The tumors that formed in *six1b*<sup>-/-</sup> zebrafish displayed an elongated, more spindle-cell morphology,  
192 suggesting that RMS cell-state fundamentally differs between RMS cells derived from wildtype and  
193 *six1b* depleted animals. To identify whether similar changes occur in human RMS, we examined the  
194 morphology of SMS-CTR and RD cells that were transduced with SIX1 shRNAs. Within approximately  
195 five passages after stable SIX1 KD, both RMS cell lines began to exhibit an altered, elongated  
196 morphology, distinguishing them from shScramble controls cells (Figure 3A-B).

197

198 We next assessed the *in vivo* outcomes of SIX1 KD in RMS tumor growth. SMS-CTR shScramble and  
199 SIX1 KD cells were xenografted subcutaneously in Matrigel into either the left or right flank of immune-  
200 compromised *NOD/SCID/IL2R $\gamma$*  mice and screened weekly for tumor growth. Tumor growth over time,  
201 as represented by tumor volume and final tumor weight, was significantly reduced in SIX1 KD tumors  
202 compared to shScramble tumors (Figure 3C-E). Histological characterization of the dissected control  
203 and SIX1 KD tumors by H&E revealed clear histological distinctions between shScramble and SIX1 KD  
204 tumors whereby all shScramble tumors exhibited high cell density while SIX1 KD tumors were sparsely  
205 populated with cells distinguished by elongated nuclear and cytoplasmic morphology (Figure 3F).  
206 Notably, upon staining xenografted tumors for pH3, we found that SIX1 KD tumors exhibited  
207 significantly less mitotic activity than shScramble tumors (Figure 3G), yet apoptosis, as measured by  
208 cleaved caspase 3 (CC3) staining, was unchanged (Suppl Fig 3). These data demonstrate that the  
209 profound differences in *in vivo* tumor growth between shScramble and SIX1 KD RMS tumors can be

210 largely attributed to the lower proliferative capacity of SIX1 KD tumors, and are not due to higher levels  
211 of apoptosis.

212

### 213 **SIX1 knockdown induces myogenic differentiation in RMS cells**

214 As described above, loss of SIX1 suppresses *in vitro* and *in vivo* RMS growth, and leads to alterations  
215 in cell morphology, consistent with morphological changes that occur during myogenic differentiation.  
216 Because SIX1 KD induced profound cell elongation and anti-proliferative phenotypes in our RMS cell  
217 lines, we asked whether these phenotypes were a consequence of SIX1 directly regulating a pro-  
218 proliferative transcriptional program, or a secondary consequence of another upstream program  
219 regulated by SIX1. We hypothesized that similar to its functions in normal skeletal muscle development,  
220 SIX1 overexpression in RMS may regulate an early myogenic transcriptional program that supports  
221 RMS cell proliferation and self-renewal<sup>7,17</sup>. Therefore, to delineate the transcriptional program  
222 coordinated by SIX1 in RMS, we performed RNA-sequencing analysis (RNAseq) on our SMS-CTR  
223 shScramble and SIX1 KD cell lines.

224

225 The RNAseq analysis revealed a total of 1017 differentially expressed genes ( $|\text{Fold-change}| \geq 1.5$  &  
226  $FDR \leq 0.25$ ) between SMS-CTR shScramble and SIX1 KD cells (Figure 4A). Of note, numerous  
227 muscle-specification genes such MYOG, MYMK, and MYMX, were marked as significantly upregulated  
228 while genes known to regulate cell motility and invasion such as TWIST2 and L1CAM were significantly  
229 downregulated<sup>22-24</sup>. To identify dysregulated pathways upon SIX1 KD, we performed gene set  
230 enrichment analysis (GSEA)<sup>25</sup>. This analysis revealed an overarching positive enrichment of muscle  
231 cell differentiation and contractile muscle gene signatures in SIX1 KD cells (Figure 4B) while chromatin  
232 assembly and developmental cell growth signatures were negatively enriched in SIX1 KD cells (Figure  
233 4B, Suppl Fig 4A). Upon closer inspection of gene expression within the MSigDB Myogenesis hallmark  
234 pathway, we again observed a clear switch in the expression pattern of canonical myogenic genes from  
235 low expression in shScramble cells to higher expression in SIX1 KD cells (Figure 4C).

236

237 To validate the changes observed in SIX1 KD cells by RNAseq, we performed qRT-PCR in both SMS-  
238 CTR and RD cell lines for a subset of differentially expressed myogenic genes identified from our  
239 RNAseq analysis. Compared to their respective shScramble control cells, SMS-CTR and RD SIX1 KD  
240 cells expressed reduced levels of *PAX7* (a TF enriched in muscle progenitors) and expressed higher  
241 levels of the myogenic regulatory factors *MYOD1*, *MYOG*, and *MYF6*. In agreement with our RNAseq  
242 results, we also observed increased expression of genes associated with myoblast fusion: *MYMK* and  
243 *MYMX* (Figure 4D)<sup>28</sup>. To further examine whether our SIX1 KD cells underwent myogenic differentiation,  
244 we stained SMS-CTR and RD SIX1 KD cells for myosin heavy chain (myHC), a marker of terminal  
245 muscle differentiation. In both cell line models, SIX1 KD cells exhibited higher proportions of myHC+  
246 cells (Figure 4E-F) and were more frequently multinucleated than shScramble cells (Figure 4G). These  
247 data indicate that SIX1 KD RMS cells are capable of terminally differentiation and forming  
248 multinucleated myofibers in contrast to shScramble cells, which maintain their muscle progenitor state.

249

250 To determine whether this muscle differentiation phenotype observed with SIX1 loss in human RMS  
251 models is conserved in the zRMS model, we additionally stained wildtype and *six1b*<sup>-/-</sup> zRMS tumors for  
252 Pax7 and myHC. In evaluable wildtype and *six1b*<sup>-/-</sup> tumor sections, we observed a decrease in Pax7  
253 staining in *six1b*<sup>-/-</sup> tumors compared to wildtype tumors (Suppl Fig 5A), indicative of a shift in  
254 differentiation status of the tumors toward a more myotube-like state. In one particular *six1b*<sup>-/-</sup> tumor,  
255 we observed strong myHC staining in the tumor section which contrasted the largely absent myHC  
256 staining in all wildtype tumor sections (Suppl Fig 5B). Taken together, these data demonstrate that  
257 *SIX1* functions to repress a myogenic differentiation program in RMS cells in both human and zebrafish  
258 models.

259

260 **SIX1 globally regulates both stem/oncogenic and myogenic differentiation genes through fine-**  
261 **tuning of super-enhancer activity**

262 To decipher the mechanism by which SIX1 loss results in transcriptional reprogramming, causing RMS  
263 cells to differentiate and stop growing, we performed an initial TF motif analysis using the RCisTarget R  
264 package to identify transcriptional regulators with predicted binding within +/-2.5kb of the TSS of the  
265 subset of differentially expressed genes. From this analysis, we observed strong enrichment for E-box  
266 motifs of which 41% (350/853) of the genes with expression differences with SIX1 KD were predicted to  
267 be regulated by the E-box myogenic TFs, *MYOD1* and/or *MYOG*, yet only 4% (37/853) of these genes  
268 were predicted to be directly regulated by SIX1 (Suppl Fig 6). Thus, we hypothesized that SIX1 loss  
269 leads to differentiation of RMS cells via reprogramming of myogenic TFs.

270

271 To determine how loss of the SIX1 TF activates a myogenic differentiation program, we performed  
272 chromatin immunoprecipitation followed by sequencing (ChIPseq) using a polyclonal antibody made  
273 against SIX1. We also performed ChIPseq against the master regulator of the myogenic lineage,  
274 *MYOD1*, and the active enhancer/chromatin histone mark H3-lysine-27 acetylation (H3K27ac) in SMS-  
275 CTR shScramble and SIX1 KD cell lines. Reflecting levels of shRNA-mediated SIX1 KD, we observed  
276 reduced genome-wide binding of SIX1 in both SIX1 KD lines compared to shScramble cells (Figure 5A)  
277 and sites of reduced SIX1 binding were highly enriched for SIX1/2 consensus motifs (Figure 5B). We  
278 further annotated genetic loci exhibiting 1.5-fold reduced SIX1 binding in both SIX1 KD lines compared  
279 to the shScramble control and found that SIX1 binding was reduced at gene loci involved in stem cell  
280 differentiation, Ras signaling, and cytoskeletal organization (Figure 5C). Accompanying sites of reduced  
281 SIX1 binding, we additionally observed decreases in *MYOD1* and H3K27ac signal (Figure 5D, Suppl  
282 Fig 7). These data suggest that SIX1 predominantly plays a transcriptional activating role in FN-RMS  
283 and that SIX1 KD leads to a reduction in transcriptional output at stem-related and Ras-driven genes.

284

285 Given the changes in H3K27ac deposition and *MYOD1* binding upon SIX1 KD, we hypothesized that  
286 SIX1 likely regulates large-scale transcriptional programs through mechanisms beyond direct  
287 transcriptional induction of *cis* genes. To determine how SIX1 KD affects global transcriptional output,



288 we annotated H3K27ac signal distribution over promoters (+/- 2.5kb from TSS), gene bodies, and distal  
289 enhancers. In SIX1 KD cells, H3K27ac distribution increased at promoter regions (+/-2.5kb of TSS) and  
290 was reduced along gene bodies and moderately reduced at distal intergenic regions/enhancers (Figure  
291 5E), showing a potential function of SIX1 in regulating enhancer activity in addition to promoter-based  
292 transcription.

293

294 To examine whether SIX1 levels influences enhancer activity, we compared enhancers and super-  
295 enhancers (SEs) via ranked H3K27ac signal between shScramble and differentiated SIX1 KD cells.  
296 Overall, 4.14%, 5.24%, and 7.37% of total H3K27ac peaks in shScramble (1470), SIX1 KD5 (1452),  
297 and SIX1 KD6 (1322) cells respectively corresponded to super-enhancers, which are characterized by  
298 long-ranging (over 12.5kb) clusters of strong H3K27ac deposition<sup>29,30</sup>. Of note, we found that many  
299 oncogenic and myogenic genes marked as differentially expressed upon SIX1 KD in our RNAseq  
300 dataset were associated with SEs. For example, in SIX1 KD cells, we observed a downward shift in  
301 ranked H3K27ac signal at the SE associated with the Notch effector and muscle stem cell enriched  
302 gene *HEYL*<sup>31</sup>, and an upward shift of H3K27ac signal at the SE associated with the contractile muscle  
303 genes *TNNT2* and *TNNI1*, denoted as the *TNNT2* SE by the Rank Ordering of Super Enhancers  
304 (ROSE) algorithm (Figure 5F). We further annotated shScramble and SIX1 KD SEs by closest  
305 neighboring genes and discovered that although SEs occurred at myogenic-associated genes in both  
306 conditions, myogenic SEs in both SIX1 KD cell lines were associated with structural and contractile  
307 functions of skeletal muscle whereas those in the shScramble cell line were associated with less  
308 differentiated skeletal muscle pathways (Figure 5G). Side-by-side comparison of H3K27ac and SIX1  
309 binding tracks at the example *HEYL* and *TNNT2/TNNI1* SEs not only reflects the shifts in SE activity  
310 seen in Figure 5F, but also demonstrates that SIX1 occupancy follows the pattern and trend of  
311 H3K27ac deposition (Figure 5H). Intriguingly, despite having global reduction in SIX1 binding and  
312 H3K27ac signal overall (Figure 5A, Suppl Fig 7), SIX1 binding and H3K27ac deposition at the  
313 *TNNT2/TNNI1* SE increased in the SIX1 KD5 line and remained relatively unchanged in the SIX1 KD6



314 line in comparison to that of the shScramble line. In contrast, SIX1 and H3K27ac signal at the *HEYL* SE  
315 were consistently reduced in both SIX1 KD lines, which contributed to the downward shift in *HEYL* SE  
316 rank in both SIX1 KD lines and reduced *HEYL* expression (Figure 5F&H). When examining the effects  
317 at a more global level, we observed similar reductions of H3K27ac signal at SEs associated with stem-  
318 related genes and relatively unchanged H3K27ac signal at SEs associated with muscle differentiation  
319 (Suppl Fig 7B). These data suggest that a loss of SE activity at stem genes may be the driving force of  
320 differentiation during SIX1 KD. As the SIX1 antibody used in ChIP has been shown to cross-react with  
321 other highly related SIX family members<sup>32</sup>, we reason that the lack of a decreased SIX1 binding at the  
322 *TNNT2/TNNI1* could be due to differences in SIX1 affinity to the myogenic loci during the differentiation  
323 state, or to the presence of a compensatory SIX member which could be recognized by the ChIP  
324 antibody. Nonetheless, these findings in the context of SIX1 loss of function, demonstrate a role for  
325 SIX1 in fine-tuning the activity of myogenic SEs that govern myogenic commitment as well as  
326 differentiation into contractile fibers.

327

### 328 **SIX1 loss alters MYOD1 occupancy at muscle differentiation and stem/oncogenic loci**

329 By regulating SE activity, we reasoned that accessibility of myogenic TFs at oncogenic and myogenic  
330 loci could be affected by SIX1 KD. We observed that loss of SIX1 resulted in a change in MYOD1  
331 distribution from distal intergenic/enhancer to promoter regions (Figure 6A). This coincides with the  
332 change in H3K27ac, indicating that SIX1 loss alters transcriptional dynamics, resulting in enhanced  
333 promoter-based and reduced enhancer-based transcription. Nearest gene annotation of MYOD1 peaks  
334 in the shScramble cell line and overlapping MYOD1 peaks in the SIX1 KD cell lines demonstrated that  
335 MYOD1 remains bound to myogenic loci in both shScramble and SIX1 KD genomes (Figure 6B).  
336 However, in the setting of reduced SIX1, we observed that MYOD1 sites occupied loci involved in  
337 positive regulation of muscle differentiation which did not appear in the top 10 pathways of shScramble  
338 MYOD1 peak (Figure 6B). Examples of the shift in MYOD1 binding are shown at the *MYMK* and  
339 *NOTCH3* loci (Figure 6C). Particularly at the *MYMK* locus, which is a key gene involved in myoblast

340 fusion and formation of multinucleated myotubes<sup>28,33</sup>, MYOD1 binding occurs at the gene promoter, and  
341 increases upon SIX1 KD (Figure 6C), which is consistent with its increased expression in SIX1 KD cells  
342 (Figure 4A&D, 6C). At the *NOTCH3* loci, MYOD1 binding occurs 22kb downstream of SIX1 within the  
343 *NOTCH3* promoter region and dramatically decreases upon SIX1 KD without a significant reduction in  
344 SIX1 binding at the upstream enhancer site and is coupled with downregulated mRNA expression  
345 (Figure 6C). In both these cases, we observed that changes in MYOD1 occupancy, rather than SIX1,  
346 aligned with H3K27ac marks. To validate the shift in MYOD1 occupancy at differentiation and  
347 progenitor-related genes in both SMS-CTR and RD cells, we performed MYOD1 Cleavage Under  
348 Targets and Release Under Nuclease (CUT&RUN) followed by qPCR (C&R qPCR), which is an  
349 orthogonal method to ChIP to detect target protein binding on DNA and requires far less cells than  
350 traditional ChIP methods<sup>34</sup>. We found that in differentiated SIX1 KD SMS-CTR cells as well as RD cells,  
351 MYOD1 was more abundantly bound at loci associated with differentiation genes, as opposed to  
352 myoblast or oncogenic genes (Figure 6D). These results reflect similar observations of MYOD1  
353 genomic occupancy shifting as a consequence of myoblast formation or RMS induction toward  
354 differentiation<sup>3,13,14,35,36</sup>. Thus, our data demonstrate that SIX1 regulates a large-scale proliferative and  
355 less differentiated cell-identity program in RMS by maintaining MYOD1 binding at SEs resulting in a  
356 loss of promoter-driven myogenic gene transcription. Thus, SIX1 loss leads to an altered myogenic TF  
357 DNA binding landscape to one that is more permissive to the expression of contractile muscle genes  
358 over the expression of stem-related genes regulated by SEs.

359

### 360 **SIX1 expression is inversely correlated with a Myotube gene signature in RMS patients**

361 The profound myogenic transcriptional program induced upon SIX1 inhibition suggests that the  
362 overexpression of SIX1 may serve as an upstream orchestrator of the aberrant muscle differentiation  
363 observed in RMS, as it does in normal muscle development<sup>8</sup>. To test this, we examined whether SIX1  
364 expression in RMS patient samples correlates with an early myogenic transcriptional landscape. Using  
365 a recently published human pluripotent stem cell (hPSC) dataset<sup>37</sup> aimed at defining the transcriptional

366 landscape at multiple stages of human myogenic differentiation, we derived a myogenic differentiation  
367 signature from PAX7+ skeletal muscle progenitors and their final cell states as multinucleated  
368 myotubes. With this hPSC data to serve as case-controls for differentiated muscle and muscle  
369 progenitors, respectively, we applied a signature scoring method (*S*-score) previously described by  
370 Hsiao and colleagues<sup>38</sup> to quantitatively score test data, RMS patient RNAseq samples, on their  
371 concordance to the gene expression signatures derived from empirical myotube-progenitor data (Figure  
372 7A). To test the performance of our *S*-scoring methodology, we confirmed using the case-control hPSC  
373 data that *S*-scoring could segregate PAX7+ progenitors, MYOG+ myoblasts, and differentiated  
374 myotubes in a stepwise manner whereby the MYOG+ cells displayed an intermediate *S*-score between  
375 muscle progenitors and myotubes (Figure 7B). Furthermore, we calculated an *S*-score for our SIX1 KD  
376 RNAseq samples based on the myotube signature and were able to distinguish shScramble from SIX1  
377 KD RMS cells based on this scoring method. SIX1 KD cells demonstrated greater alignment with the  
378 myotube signature, consistent with the results of other enrichment scoring methods used previously in  
379 Figure 4 (Figure 7C). Importantly, using this quantitative scoring technique, we are able to assess what  
380 stage of the myogenic differentiation cascade our RMS cells lie.

381

382 We next assessed how SIX1 expression correlates with myotube *S*-scores in RMS patient samples. In  
383 the St Jude iRDb cohort, we found a modest and statistically significant inverse correlation between  
384 SIX1 expression and myotube *S*-Scores (Figure 8D, Spearman correlation:  $R = -0.36$ ,  $p = 0.0012$ ). We  
385 additionally applied the same signature scoring algorithm to generate a SIX1 KD signature using our  
386 SIX1 KD RNAseq dataset as case (KD)-controls (shScramble) and *S*-scored both St Jude and  
387 GSE108022 RMS patient samples based upon SIX1 KD and myotube gene signatures. We observed  
388 strong positive correlations (St Jude:  $R = 0.57$ ,  $p < 0.001$ , GSE108022:  $R = 0.61$ ,  $p < 0.001$ ) between the  
389 two signatures in the RMS patients, indicating that loss of SIX1 expression in RMS cells induces a  
390 transcriptional program highly similar to that which is observed by a myoblast transitioning to the  
391 myotube fate (Figure 7E).

392

393 Given the concordance of the SIX1 KD signature with the myotube signature, we next sought to  
394 examine whether these two signatures could be used to distinguish advanced RMS disease from  
395 primary disease. Of the 71 patient samples with complete RNAseq data available from the St Jude  
396 iRDb cohort, three of these patients had RNA-sequencing performed at multiple stages of the patient's  
397 disease progression. Filtering down our analysis to these three patients, we examined whether disease  
398 recurrence was associated with changes in myogenic differentiation state. By myotube and SIX1 KD S-  
399 scoring, we observed that patient tumor expression profiles at diagnoses and disease recurrence states  
400 were distinguishable by differentiation and SIX1 KD scores, whereby relapsed tumors exhibited lower  
401 SIX1KD and myotube S-scores than their tumor at diagnosis (Figure 7F). Of note, we observed that the  
402 two relapsed tumor samples from patient B012 had lower Myotube and SIX1 KD S-scores compared to  
403 the tumor at diagnosis (Figure 7F). These data underscore our findings that the transcriptional program  
404 controlled by SIX1 in RMS is intimately linked to myogenic differentiation status, which is a driving force  
405 of RMS tumor progression.

406

## 407 **Discussion**

408 Repression of myogenic differentiation programs is a known, critical attribute of RMS whereby  
409 dysfunctional MYOD1 and MYOG activity is thought to drive the disease<sup>3,39-42</sup>. An unresolved question  
410 that persists in the field of RMS is why RMS tumors express the myogenic TFs, MYOD1 and MYOG,  
411 yet fail to progress past the apparent myoblast progenitor state<sup>2,43,44</sup>. While it is known that MYOD1 and  
412 MYOG have distinct subprograms that can drive either self-renewal or skeletal muscle differentiation,  
413 the departure of these MRFs from their canonical abilities to execute the complete sequence of skeletal  
414 muscle development in RMS invokes other factors that may repress the ability of MYOD1 to act on its  
415 differentiation programs. Therefore, the identification of other regulatory proteins that alter the context-  
416 specific functions of MYOD1 has become a core area of RMS studies<sup>3-5</sup>. Here, we report that the SIX1

417 homeobox TF acts as an upstream transcriptional regulator maintaining the arrest of RMS cells in a  
418 self-renewing muscle progenitor state. In the developmental context, the *SIX1* homeobox gene is highly  
419 expressed in early muscle development and is responsible for the direct activation of early MRF  
420 expression, but its expression becomes downregulated as the muscle reaches its final stages of  
421 differentiation<sup>45,46</sup>. Using zebrafish and human cell line FN RMS models, we demonstrate that genetic  
422 inhibition of *SIX1/six1b* can trigger the activation of a muscle differentiation gene program in RMS cells,  
423 thus halting their growth and spread. These data are supported by preceding reports that show  
424 downregulation of *SIX1* occurs during the final stages of muscle differentiation and embryonic  
425 myogenesis<sup>11,37,45,46</sup>, and further supports the hypothesis that aberrant *SIX1* expression in RMS may be  
426 in part responsible for the MRF dysfunction occurring in RMS.

427

428 In the majority of studies implicating the role of *SIX1* in cancer progression, *SIX1* ostensibly acts as a  
429 TF that induces the expression of downstream tumor-promoting genes. Notably, in two previous reports,  
430 the pro-metastatic functions of *Six1* in Rhabdomyosarcoma (RMS) were reported to be channeled  
431 through one of *Six1*'s transcriptional targets, Ezrin, a cytoskeletal protein<sup>47,48</sup>, which was proposed to  
432 alter migration and invasion and thus contribute to RMS progression. In this study, we show for the first  
433 time that *SIX1* promotes tumor growth/progression largely via alteration of global transcriptional  
434 programs of muscle cell-identity. Thus, while direct targets such as Ezrin likely contribute to its  
435 aggressive functions in RMS, the major function of *SIX1* in RMS progression appears to be through  
436 changing cell fate by regulating transcriptional programs upstream of myogenic TFs. In normal  
437 development, *Six1* loss in muscle precursor cells leads to reduced MRF expression and concomitant  
438 defects in skeletal muscle formation<sup>7,8,11,16,17,49,50</sup>. In the context of FN-RMS, we observe that *SIX1* KD is  
439 associated with loss of progenitor gene expression but a gain of muscle differentiation gene expression,  
440 raising the question of how *SIX1* activates a differentiation program while it is itself suppressed. By  
441 ChIPseq, we observe that genome wide *SIX1* binding closely overlaps with H3K27ac marks at  
442 promoters and SE regulatory elements. *SIX1* KD leads to decreases in *SIX1* binding at cytoskeletal,

443 cell division, and stem-related loci, which aligns with previously characterized roles of *SIX1*<sup>47,48,51-54</sup>. On  
444 a global scale, *SIX1* binding is enriched at SEs, enhancers, and promoters associated with cell division,  
445 cell-identity, and muscle specification. Upon *SIX1* KD, SE activity as approximated by H3K27ac signal  
446 is diverted from progenitor/stem-related SEs to SEs associated with that of forming contractile muscle  
447 and other structural components of skeletal muscle differentiation, which manifest as the multinucleated  
448 and elongated morphology of *SIX1* KD cells. In addition to these direct forms of transcriptional  
449 regulation either at target loci or at distal regulatory elements, we found that *SIX1* can indirectly  
450 influence the DNA binding activity of MYOD1 and possibly other myogenic TFs by modifying the  
451 landscape of active chromatin and consequently TF binding accessibility at differentiation loci.

452

453 Pluripotency and cell type determination are controlled by the occupancy of master TFs and cell-type  
454 specific TFs at enhancer regions governing cell fate decisions<sup>29,55</sup>. Within the repertoire of muscle-  
455 lineage enhancers, several TFs, which based on our studies include *SIX1*, have come to light as  
456 master TFs that initialize the myogenic lineage by sitting poised at myoblast enhancer elements and  
457 then become overactive in the context of RMS<sup>35,36,39,42</sup>. Notably, these factors include the  
458 developmental TFs *SNAI1/2* and *TWIST2*, which similar to *SIX1* are found at stem and myogenic  
459 enhancer elements in RMS and are drivers of EMT, cell migration, and tissue repair<sup>13,35,36</sup>. Our focused  
460 study of *SIX1* compounds on growing evidence that the composition of TFs at muscle-specific  
461 enhancers controls the differentiation state of RMS cells, which raises multiple outstanding questions.  
462 First, this raises the question of what factors cause *SIX1* to become overexpressed in FN-RMS tumors,  
463 particularly given the absence of *SIX1* amplification or any common perturbation of the locus. Whereas  
464 *SIX1* has been identified as target downstream of the *PAX3-FOXO1* fusion, the mechanism leading to  
465 *SIX1* overexpression in FN-RMS is less understood<sup>56</sup>. Second, our findings raise the question of how  
466 diverse driver mutations associated with FN-RMS impinge on similar myogenic  
467 epigenetic/transcriptional programs in similar fashion to the *PAX3-FOXO1* fusion protein in FP-RMS<sup>57-</sup>  
468 <sup>59</sup>. Notably, genome-wide *PAX3-FOXO1* fusion binding establishes SEs at myogenic genes and recruits

469 the co-activator proteins p300, BRD4, and Mediator<sup>59</sup>, and similar functions may apply to TFs like *SIX1*  
470 in FN-RMS . Finally, the collection of these studies raises the question of whether RMS cells can be  
471 irreversibly reprogrammed to follow the proper cascade of myogenic differentiation through targeting  
472 master TF activity. Although there are still many barriers facing the viability of TFs as pharmacological  
473 targets, dissection of mechanisms that modulate specific TF activities can potentially reveal druggable  
474 nodes that control cell-type specific transcriptional programs. For example, the requirement of an EYA  
475 phosphatase co-factor interaction with *SIX1* to strongly activate downstream target transcription  
476 represents one targetable node to *SIX1* activity that our group is actively interrogating<sup>60-63</sup>. Thus, it will  
477 be of future interest to determine whether the EYA phosphatase plays a similar role together with *SIX1*  
478 in trapping RMS cells in a progenitor-like state.

479

480 In summary, our studies demonstrate that the *SIX1* TF prevents FN-RMS from undergoing the cascade  
481 of myogenic gene expression leading to differentiation via the regulation of transcriptional output at  
482 stem versus myogenic genes. We show that FN-RMS differentiates into non-proliferative myotube-like  
483 cells following *SIX1* inhibition, and that the differentiation program is achieved by a shift in *MYOD1*  
484 binding and enhanced transcriptional activity from genetic loci that foster cell growth to loci that specify  
485 and drive the myogenic lineage. Altogether, these findings define an epigenetic function of *SIX1* in  
486 balancing the growth and differentiation properties intrinsic to the myogenic lineage and ultimately  
487 demonstrate *SIX1* as suitable therapeutic target in RMS.

488

489

490

491

492

493

494

495

496

497

## 498 **Main Figure Legends**

### 499 **Figure 1. SIX1 is overexpressed and predicted to be an essential gene in Rhabdomyosarcoma**

500 (A) Fragments per kilobase million (FPKM) expression of SIX1 in the St. Jude Pediatric Cancer  
501 Genome Project cohort (Grey = three normal skeletal muscle controls; FQ21 = fetal quadriceps muscle).  
502 (B) IHC staining counterstained with hematoxylin and DAB intensity scoring of an RMS tumor array with  
503 normal skeletal muscle controls. (C) Frequency distribution of IHC scores across RMS and skeletal  
504 muscle tissue cores and frequency distribution of tissue cores with IHC scores  $\geq 2$ . (D) SIX1 transcripts  
505 per kilobase million (TPM) expression against SIX1 gene effect score in 1775 cell lines in the Cancer  
506 Dependency map CRISPR-Cas9 large-scale KO screen (RMS cell lines in blue). (E) Volcano plot of  
507 gene dependency scores for MYOD1 (blue) and SIX1 (red) in RMS cell lines versus all other cell lines  
508 of different tissue types. Statistical analysis of gene dependencies between RMS and all other cell  
509 types were performed using a two-class Kolmogorov-Smirnov test. (F) Western blot of SIX1 protein  
510 levels across a panel of FN and FP RMS human cell lines (G) shRNA-mediated knockdowns of SIX1 in  
511 RD and SMS-CTR cell lines. (H) IncuCyte live-cell imaging growth assays of SMS-CTR and RD  
512 shScramble and SIX1 KD cells over a 96-hrs. Cells were plated in triplicate and relative cell growth was  
513 measured by normalizing cell confluency at each time point relative to initial timepoint confluency. Data



514 represent mean  $\pm$  SEM and statistical differences between shScramble and SIX1 KD5 or SIX1 KD6  
515 was measured by fitting data to a longitudinal mixed effects model. (I) Mitotic activity of SMS-CTR and  
516 RD shScramble and SIX1 KD cells measured by pH3 staining. Cells were counterstained with DAPI.  
517 Data represent mean  $\pm$  SEM of at least 3 independent experiments.

518

## 519 **Figure 2. *six1b* is required for zebrafish RMS tumor growth**

520 (A) qRT-PCR expression of zebrafish *six1* paralogs *six1a* and *six1b* in dissected GFP+ zRMS tumor  
521 tissue compared to age-matched normal skeletal muscle ( $n = 4$  normal muscle samples,  $n = 6$  zRMS  
522 tumor samples). (B) Representative images of *six1b* transcripts as visualized by H&E and *in situ*  
523 hybridization signal (purple puncta;  $n = 5$  fish per group) (C) Representative images of tumor  
524 progression (outlined in green) over 28 days from 57-85 days post fertilization (dpf) between wildtype  
525 and *six1b*<sup>-/-</sup> tumor-burdened individuals. Yellow outline represents autofluorescence from stomach and  
526 yolk. (D) Quantification of tumor area by GFP+ tumor area in each individual fish over time. Tumor  
527 growth per individual is represented as individual tracks and composite growth of wildtype and *six1b*<sup>-/-</sup>  
528 tumors was fitted to a non-linear logistical growth model and represented by dotted lines. A longitudinal  
529 mixed effect model was used to measure statistical differences between conditions over repeated  
530 measures. (E) Tumor area growth over time normalized to standard length of fish at 120 dpf or at prior  
531 time point due to moribundity. (F) Representative staining and quantification of H&E and phospho-  
532 histone H3 IHC (brown) in sectioned zRMS tumors. Dots in graph represent %pH3 staining per tumor  
533 section; pH3 staining quantified over 2 sections per tumor ( $n = 4$  wt tumors,  $n = 3$  *six1b*<sup>-/-</sup> tumors).  
534 Statistical differences were calculated using a Welch's *t*-test.

535

## 536 **Figure 3. SIX1 knockdown inhibits human RMS tumor growth and progression**

537 (A) Brightfield images depicting elongated cell morphology of SIX1 KD SMS-CTR and RD cells along  
538 with (B) quantification of cell lengths. (C) Tumor volumes, measured by caliper, over a 12-week time  
539 period of shScramble and SIX1 KD SMS-CTR cells that were engrafted bilaterally into the flanks of

540 NOD/SCID $\gamma$  (NSG) mice. Data represent mean  $\pm$  SEM and were fitted to a longitudinal mixed effects  
541 model for statistical analysis of shScramble and SIX1 KD samples (D) Representative images of  
542 dissected shScramble or SIX1 KD xenografted tumors at 12 weeks. (E) Final tumor weights in grams at  
543 the end of the 12-week study. ( $n = 10$  mice total; 10 mice received shScramble cells in one flank, and  
544 SIX1 KD cells in opposite flank. 5 mice received a SIX1 KD5 flank injection, and 5 mice received a SIX1  
545 KD6 flank injection). (F) Representative H&E histology of dissected shScramble and SIX1 KD  
546 xenografted tumors. (G) Representative pH3 immunostaining (brown) of dissected shScramble and  
547 SIX1 KD xenografted tumors. Dots in graph represent %pH3+ staining per tumor section; pH3  
548 staining quantified over 2 sections per tumor.

549 **Figure 4. SIX1 knockdown induces myogenic differentiation in RMS cells**

550 (A) Volcano plot of log<sub>2</sub>fold-change (FC) gene expression (SIX1 KD over shScramble) and adjusted  $p$ -  
551 value after edgeR-based differential expression analysis from the SMS-CTR RNAseq experiment. Red  
552 dots denote genes significantly upregulated ( $FC \geq 1.5$  & adj  $p$ -value  $\leq 0.25$ ) and blue dots denote genes  
553 significantly downregulated ( $FC \leq -1.5$  & adj  $p$ -value  $\leq 0.25$ ) upon SIX1 KD. (B) Gene set enrichment  
554 analysis plots of ranked log<sub>2</sub>FC expression (SIX1 KD over shScramble) show positive enrichment for  
555 curated muscle cell differentiation and skeletal muscle contraction gene signatures and negative  
556 enrichment for chromatin assembly gene signatures. (C) Heatmap plotting expression of the MSigDB  
557 myogenesis gene set across shScramble and SIX1 KD samples. Scale bar represents z-score-  
558 converted log<sub>2</sub>CPM values. (D) Validation of differential mRNA expression of genes involved in muscle  
559 differentiation in SMS-CTR and RD cell lines with SIX1 KD by qRT-PCR. Barplot data represent mean  
560  $\pm$  SEM expression values across  $n \geq 5$  independently collected biological samples. (E) Positive MyHC  
561 (MF-20, red) immunostaining and DAPI counterstain (blue) in SIX1 KD RMS cells compared to  
562 shScramble RMS cells. (F) Quantification of myHC staining over total nuclei per field of view (each dot  
563 represents %myHC+ cells over one technical replicate from at least 3 independent experiments) and  
564 (G) fusion indices of SMS-CTR and RD control and SIX1 KD cells.

565

566 **Figure 5. SIX1 globally regulates both stem/oncogenic and myogenic differentiation genes**

567 **through fine-tuning of super-enhancer activity**

568 (A) Heatmaps of genome-wide SIX1 ChIPseq signal in SMS-CTR shScramble, SIX1 KD5, and SIX1  
569 KD6 cells. Heatmaps were generated using deepTools and centered at shScramble SIX1 peaks. (B)  
570 Motif analysis on peak coordinates exhibiting reduced 1.5-fold SIX1 binding in both SIX1 KD5 and SIX1  
571 KD6 SMS-CTR SIX1 ChIPseq datasets. Top 4 enriched motifs shown. (C) Pathway enrichment plots of  
572 annotated sites of SIX1 loss in both SIX1 KD5 and KD6 cell lines. Enrichment plots were generated  
573 using ChIPseeker followed by ClusterProfiler R packages with gene set sizes restricted to 100 to 250  
574 genes and a q-value cut-off of 0.05. (D) ChIPseq average profiles of MYOD1, and H3K27ac signal over  
575 SIX1 binding sites that exhibited reduced binding in SIX1 KD cells compared to shScramble cells.  
576 Average profiles were centered around reduced SIX1 peaks and show co-occurrence of SIX1 and  
577 MYOD1 binding as well as H3K27ac deposition in SMS-CTR cells. (E) Peak distribution of H3K27ac  
578 signals in SMS-CTR shScramble, SIX1 KD5, and SIX1 KD6 cells across promoters (+/-2.5kb from  
579 annotated TSS), 5/3' UTR, gene body, and distal intergenic/enhancer regions. (F) ROSE analysis  
580 performed on shScramble and SIX1 KD H3K27ac CHIP peaks depicts the shift in *HEYL* (down) and  
581 *TNNT2/TNNI1* (up) SE rank between shScramble and differentiated SIX1 KD cells. Although not  
582 defined as an SE (top right quadrant of hockey stick plot), the *LGR5* enhancer also shifts downward in  
583 SIX1 KD cells and is a gene associated with self-renewal and stem properties. (G) Pathway enrichment  
584 of genes associated with SEs identified in shScramble and the union of SEs identified in SIX1 KD5 and  
585 SIX1 KD6 (SIX1 KD) cells using gene set sizes restricted to 100 to 250 genes and a q-value cut-off of  
586 0.05. (H) H3K27ac and SIX1 ChIP signal over the *HEYL* and *TNNT2/TNNI1* SEs depict changes in  
587 SIX1 binding abundance at stem cell (*HEYL*) and muscle differentiation (*TNNT2/TNNI1*) loci during  
588 SIX1 KD-induced differentiation and respective levels of *HEYL* and *TNNT2/TNNI1* expression as  
589 observed in the RNAseq data. ChIPseq tracks were generated using the Washington University  
590 Epigenome Browser.

591

592 **Figure 6. SIX1 loss alters MYOD1 occupancy at muscle differentiation and stem/oncogenic loci**

593 (A) Peak distribution of the MYOD1 TF in SMS-CTR shScramble, SIX1 KD5, and SIX1 KD6 cells  
594 across promoters ( $\pm$ 2.5kb from annotated TSSs), 5/3' UTR, gene body, and distal intergenic/enhancer  
595 regions. (B) Pathway enrichment of annotated MYOD1 peaks that were called in shScramble and the  
596 union of MYOD1 peaks called in SIX1 KD5 and SIX1 KD6 cells (SIX1 KD). (C) H3K27ac, MYOD1, and  
597 SIX1 ChIPseq tracks over the *MYMK* and *NOTCH3* loci depict changes in MYOD1 binding that occur  
598 downstream of SIX1 loss and correlate with upregulation of MYMK and downregulation of NOTCH3  
599 expression. ChIPseq tracks were generated using the Washington University Epigenome Browser. (D)  
600 CUT&RUN qPCR validation of changes in MYOD1 binding at stem/oncogenic (*HEYL*, *NOTCH3*,  
601 *EGFR*), and myogenic differentiation genes (*MYMK*, *MYLK2*, *TNNT2*) that occur in SMS-CTR and RD  
602 SIX1 KD5 cells. Statistical differences were measured using a two-way ANOVA test followed by a *post-*  
603 *hoc* Sidak's multiple comparisons test.

604

605 **Figure 7. SIX1 expression in RMS is inversely correlated with a myotube gene signature**

606 (A) Overview of *S*-scoring methodology whereby gene expression in the case-control (hPSC  
607 differentiated myotubes and Pax7+ progenitors, respectively) group is used to generate a weighted  
608 gene signature to score test sample transcriptomes on a continuous scale. (B) Myotube *S*-scores for  
609 samples used in training set plotted as proof-of-concept that the Myotube *S*-score can quantify  
610 myogenic differentiation status. Statistical differences measured by two-side Student's *t*-tests. (C)  
611 Myotube *S*-scoring methodology applied to SIX1 KD RNAseq dataset demonstrates that SIX1 KD cells  
612 are more advanced in myogenic lineage than shScramble cells. Statistical differences measured by  
613 two-side Student's *t*-tests. (D) Scatter plot of Myotube *S*-score plotted against SIX1 z-score-converted  
614 expression and Spearman rank correlation coefficient depict a moderate inverse correlation between  
615 differentiation status and SIX1 expression in St Jude iRDb RNAseq patient samples ( $n = 71$ ). (E)

616 Scatter plot of SIX1 KD S-scores derived from SIX1 KD RNAseq data against Myotube S-score shows  
 617 a strong positive correlation between the SIX1 KD and myotube gene signatures in the St Jude iRDb  
 618 expression dataset. (F) Myotube and SIX1 KD S-scores of three patient tumors (SJRHB011 = “B011”,  
 619 SJRHB012 = “B012”, SJRHB026 = “B026”) collected and sequenced at multiple disease stages.

620

621

## 622 STAR Methods

### 623 Key Resources

| REAGENT or RESOURCE                                  | SOURCE                     | IDENTIFIER             |
|------------------------------------------------------|----------------------------|------------------------|
| <b>Antibodies</b>                                    |                            |                        |
| Mouse monoclonal anti-SIX1 (1229, 992)               | In-house purified antibody | N/A                    |
| Rabbit polyclonal anti-SIX1/2                        | Atlas Antibodies           | HPA0011893; AB_1079991 |
| Rabbit polyclonal anti-H3K27ac                       | Abcam                      | ab4729; AB_2118291     |
| Rabbit monoclonal anti-MYOD1                         | Abcam                      | ab133627; AB_2890928   |
| Mouse monoclonal anti-myosin heavy chain             | DSHB                       | MF-20; AB_2147781      |
| Mouse monoclonal anti-PAX7                           | DSHB                       | PAX7; AB_528428        |
| Rabbit polyclonal anti-phosphohistone H3 (pSer10)    | Sigma-Aldrich              | H0412; AB_477043       |
| Rabbit polyclonal anti-cleaved caspase 3             | Cell Signaling Technology  | 9661; AB_2341188       |
| Normal Rabbit IgG                                    | Cell Signaling Technology  | 2729; AB_1031062       |
| Mouse $\beta$ -TUBULIN                               | Sigma-Aldrich              | T4026; AB_477577       |
| Mouse $\beta$ -ACTIN                                 | Sigma-Aldrich              | A5316; AB_476743       |
| Mouse $\beta$ -ACTIN-HRP                             | Abcam                      | ab49900; AB_867494     |
| <b>Bacterial and virus strains</b>                   |                            |                        |
| Subcloning Efficiency DH5 $\alpha$ competent cells   | ThermoFisher               | 18265017               |
| <b>Biological samples</b>                            |                            |                        |
| Rhabdomyosarcoma with striated muscle tumor array    | Biomax                     | SO2082b                |
| <b>Chemicals, peptides, and recombinant proteins</b> |                            |                        |
| Polybrene                                            | Millipore                  | TR-1003                |
| Phenol-red solution                                  | Sigma                      | P0290                  |
| Puromycin Dihydrochloride                            | Research Products Int.     | P33020                 |
| pAG-MNase                                            | EpiCypher                  | 15-1116                |
| Fugene Transfection Reagent                          | Promega                    | E2311                  |
| Tricaine (MS-222)                                    | Sigma Aldrich              | A5040                  |
| ECL Western blot substrate                           | Pierce                     | 32106                  |
| Digitonin                                            | Millipore Sigma            | 30-041                 |
| Spermidine                                           | Sigma Aldrich              | S0266                  |

| <b>Critical commercial assays</b>                          |                                                  |                                                                                                                                 |
|------------------------------------------------------------|--------------------------------------------------|---------------------------------------------------------------------------------------------------------------------------------|
| MycoAlert detection kit                                    | Lonza                                            | LT07-418                                                                                                                        |
| Direct-zol RNA prep kit                                    | Zymo Research                                    | R2052                                                                                                                           |
| iScript reverse transcription kit                          | Bio-Rad                                          | 1708841                                                                                                                         |
| SsoFast EvaGreen supermix                                  | Bio-Rad                                          | 1725205                                                                                                                         |
| Verso cDNA synthesis kit                                   | ThermoFisher                                     | AB-1453A                                                                                                                        |
| Taqman gene expression master mix                          | Applied Biosystems                               | 4369542                                                                                                                         |
| Nuclei EZ prep kit                                         | Sigma Aldrich                                    | NUC101                                                                                                                          |
| Dynabeads Antibody Coupling kit                            | ThermoFisher                                     | 14311D                                                                                                                          |
| Concavalin A beads                                         | EpiCypher                                        | 21-1401                                                                                                                         |
| Universal Plus mRNA-Seq library prep kit                   | Nugen                                            | 0508                                                                                                                            |
| KAPA HyperPrep ChIP library kit                            | Roche                                            | KK8502                                                                                                                          |
| NEBNext II Ultra library prep kit                          | NEB                                              | E7645, E7600S                                                                                                                   |
| DNA Clean and Concentrator kit                             | Zymo Research                                    | D4033                                                                                                                           |
| <b>Deposited data</b>                                      |                                                  |                                                                                                                                 |
| SIX1 KD RNAseq                                             | This paper                                       | N/A                                                                                                                             |
| SIX1 KD ChIPseq                                            | This paper                                       | N/A                                                                                                                             |
| Pan-Sarcoma and normal tissue expression                   | Downloaded from Oncogenomics database            | <a href="https://fsabcl-pob01p.ncicrf.gov/cgi-bin/JK">https://fsabcl-pob01p.ncicrf.gov/cgi-bin/JK</a>                           |
| Pediatric Sarcoma expression                               | Downloaded from St. Jude PeCAN portal            | <a href="https://pecan.stjude.cloud/proteinpaint/study/pan-target">https://pecan.stjude.cloud/proteinpaint/study/pan-target</a> |
| Rhabdomyosarcoma patient RNAseq                            | Downloaded from St. Jude Integrated RMS Database | <a href="https://pecan.stjude.cloud/proteinpaint/study/RHB2018">https://pecan.stjude.cloud/proteinpaint/study/RHB2018</a>       |
| hPSC muscle differentiation RNAseq                         | <sup>37</sup>                                    | GSE129505                                                                                                                       |
| <b>Experimental models: cell lines</b>                     |                                                  |                                                                                                                                 |
| HEK293T                                                    | ATCC                                             | CVCL_0063                                                                                                                       |
| Human: RH30                                                | Mark Hatley <sup>64</sup>                        | CVCL_0041                                                                                                                       |
| Human: RH3 (RH28)                                          | Mark Hatley                                      | CVCL_L415                                                                                                                       |
| Human: RH4                                                 | Mark Hatley                                      | CVCL_5916                                                                                                                       |
| Human: RD                                                  | Mark Hatley                                      | CVCL_1649                                                                                                                       |
| Human: RH36                                                | Mark Hatley                                      | CVCL_M599                                                                                                                       |
| Human: RH2                                                 | Mark Hatley                                      | CVCL_A460                                                                                                                       |
| Human: SMS-CTR                                             | Mark Hatley                                      | CVCL_A770                                                                                                                       |
| Human: SMS-CTR stable shScramble                           | This paper                                       | N/A                                                                                                                             |
| Human: SMS-CTR stable shSIX1 KD5                           | This paper                                       | N/A                                                                                                                             |
| Human: SMS-CTR stable shSIX1 KD6                           | This paper                                       | N/A                                                                                                                             |
| Human: RD stable shScramble                                | This paper                                       | N/A                                                                                                                             |
| Human: RD stable shSIX1 KD5                                | This paper                                       | N/A                                                                                                                             |
| Human: RD stable shSIX1 KD6                                | This paper                                       | N/A                                                                                                                             |
| <b>Experimental models: organisms/strains</b>              |                                                  |                                                                                                                                 |
| Zebrafish: AB                                              | ZIRC                                             | ZL1                                                                                                                             |
| Zebrafish: <i>six1b</i> <sup>oz1</sup>                     | Sharon Amacher <sup>11</sup>                     | N/A                                                                                                                             |
| Mouse: NOD/SCID $\gamma$                                   | CU AMC Breeding Core                             | N/A                                                                                                                             |
| <b>Oligonucleotides</b>                                    |                                                  |                                                                                                                                 |
| For SYBR cDNA primer sequences, see Supplemental Table 1.1 | This paper                                       | N/A                                                                                                                             |

|                                                               |                              |                                                                                                                             |
|---------------------------------------------------------------|------------------------------|-----------------------------------------------------------------------------------------------------------------------------|
| For SYBR CUT&RUN primer sequences, see Supplemental Table 1.2 | This paper                   | N/A                                                                                                                         |
| For Taqman Primer/Probe sequences, see Supplemental Table 1.3 | This paper                   | N/A                                                                                                                         |
| <b>Recombinant DNA</b>                                        |                              |                                                                                                                             |
| <i>rag2-KRASG12D</i>                                          | David Langenau <sup>19</sup> | N/A                                                                                                                         |
| <i>rag2-eGFP</i>                                              | David Langenau               | N/A                                                                                                                         |
| <i>pLKO.1-shSIX1 KD5</i> (3'UTR)                              | Functional Genomics Core     | TRCN0000015233                                                                                                              |
| <i>pLKO.1-shSIX1 KD6</i> (CDS)                                | Functional Genomics Core     | TRCN0000015236                                                                                                              |
| <i>pLKO.1-shScramble</i>                                      | Addgene                      | 1864                                                                                                                        |
| <b>Software and algorithms</b>                                |                              |                                                                                                                             |
| FastQC                                                        | Babraham Bioinformatics      | <a href="https://www.bioinformatics.babraham.ac.uk/projects/">https://www.bioinformatics.babraham.ac.uk/projects/</a>       |
| BBDuk                                                         | Joint Genome Institute       | <a href="http://jgi.doe.gov/data-and-tools/bb-tools">http://jgi.doe.gov/data-and-tools/bb-tools</a>                         |
| STAR                                                          | <sup>65</sup>                | <a href="http://code.google.com/p/rna-star/">http://code.google.com/p/rna-star/</a>                                         |
| edgeR                                                         | <sup>66</sup>                | <a href="https://bioconductor.org/packages/edgeR">https://bioconductor.org/packages/edgeR</a>                               |
| clusterProfiler                                               | <sup>67</sup>                | <a href="https://bioconductor.org/packages/clusterProfiler">https://bioconductor.org/packages/clusterProfiler</a>           |
| RCisTarget                                                    | <sup>68</sup>                | <a href="https://bioconductor.org/packages/RCisTarget">https://bioconductor.org/packages/RCisTarget</a>                     |
| Bowtie2 (v.2.3.4.3)                                           | <sup>69</sup>                | <a href="http://bowtie-bio.sourceforge.net/bowtie2/index.shtml">http://bowtie-bio.sourceforge.net/bowtie2/index.shtml</a>   |
| Samtools (v.1.11)                                             | <sup>70</sup>                | <a href="http://www.htslib.org/">http://www.htslib.org/</a>                                                                 |
| Picard                                                        | Broad Institute              | <a href="http://broadinstitute.github.io/picard/">http://broadinstitute.github.io/picard/</a>                               |
| Bedtools                                                      | <sup>71</sup>                | <a href="https://github.com/arq5x/bedtools2/releases">https://github.com/arq5x/bedtools2/releases</a>                       |
| MACS2                                                         | <sup>72</sup>                | <a href="https://pypi.org/project/MACS2/">https://pypi.org/project/MACS2/</a>                                               |
| ChIPseeker                                                    | <sup>73</sup>                | <a href="https://bioconductor.org/packages/ChIPseeker/">https://bioconductor.org/packages/ChIPseeker/</a>                   |
| ngs.plot                                                      | <sup>74</sup>                | <a href="https://github.com/shenlab-sinai/ngsplot">https://github.com/shenlab-sinai/ngsplot</a>                             |
| deepTools                                                     | <sup>75</sup>                | <a href="https://github.com/deeptools">https://github.com/deeptools</a>                                                     |
| HOMER (v.4.11)                                                | <sup>76</sup>                | <a href="http://homer.ucsd.edu/homer/">http://homer.ucsd.edu/homer/</a>                                                     |
| Rank Ordering of Super Enhancers (ROSE)                       | <sup>29,30</sup>             | <a href="http://younglab.wi.mit.edu/super_enhancer_code.html">http://younglab.wi.mit.edu/super_enhancer_code.html</a>       |
| R version 3.6.3                                               | The R project                | <a href="http://www.r-project.org">www.r-project.org</a>                                                                    |
| Python version 3.8                                            | Python                       | <a href="https://www.python.org/">https://www.python.org/</a>                                                               |
| FIJI                                                          | ImageJ                       | <a href="http://imagej.nih.gov/ij">http://imagej.nih.gov/ij</a>                                                             |
| Prism 9                                                       | GraphPad                     | <a href="http://www.graphpad.com">www.graphpad.com</a>                                                                      |
| IGV 2.8.0                                                     | Broad Institute              | <a href="https://software.broadinstitute.org/software/igv/2.8.x">https://software.broadinstitute.org/software/igv/2.8.x</a> |
| Signature Scoring Algorithm (S-score)                         | <sup>38</sup>                | In-house R scripts                                                                                                          |
| <b>Other</b>                                                  |                              |                                                                                                                             |



|                                  |              |          |
|----------------------------------|--------------|----------|
| Nunc LabTek Chamber Slide System | ThermoFisher | 154526PK |
|----------------------------------|--------------|----------|

624

## 625 **Resource Availability**

### 626 **Lead Contacts**

627 Further information and requests for resources and reagents should be directed to and will be fulfilled  
628 by the lead contacts, Heide L. Ford (heide.ford@cuanschutz.edu) and Kristin B. Artinger  
629 (kristin.arteringer@cuanschutz.edu)

630

### 631 **Materials availability**

632 This study did not generate new unique reagents.

633

### 634 **Data and code availability**

635 Scripts and code generated during this study are available upon request. RNAseq and ChIPseq  
636 datasets generated in this paper are deposited on GEO (GSE173155). Clinical datasets analyzed in  
637 this study are provided in the Key Resources table.

638

## 639 **Method Details**

### 640 **Clinical RNAseq Datamining**

641 Clinical sarcoma expression data was obtained from the NCI Oncogenomics database managed by Dr.  
642 Javed Khan at the NIH. Clinical RMS RNAseq expression data was downloaded from the St. Jude  
643 PeCAN portal and Integrated Rhabdomyosarcoma Database.

644

### 645 **Zebrafish line maintenance**

646 Zebrafish lines used in this study were maintained in compliance with the University of Colorado  
647 Anschutz Medical Campus IACUC guidelines and policies. The *six1b<sup>oz1</sup>* mutant line used in this study



648 was a generous gift from Dr. Sharon Amacher's lab and crossed as heterozygotes to generate wildtype,  
649 heterozygote, and mutant homozygote progeny. Fish were genotyped as described previously  
650 described<sup>11</sup>.

651

### 652 **Zebrafish ERMS Studies**

653 Zebrafish ERMS tumors were established using previously described methods by the Langenau Lab.  
654 *rag2-kRASG12D* and *rag2-eGFP* plasmids were linearized with NotI and purified using the Zymo Clean  
655 and Concentrator kit. Linearized DNA was diluted to a stock concentration of 100ng/μL and injected  
656 with phenol-red dye into the single-cell stage of embryos for a final concentration of 5pg/embryo per  
657 *rag2* plasmid. Zebrafish tumor initiation events were recorded at 36 days post-injection and every week  
658 thereafter until 180 days. Tumor area was measured weekly using a Leica epifluorescent  
659 stereomicroscope along with body length to adjust for changes in basal growth of fish.

660

### 661 **Zebrafish *in situ* hybridization on zRMS tissue**

662 Zebrafish tumor and normal muscle control tissues were fixed in 4% PFA for 2 hours at room  
663 temperature (RT), rinsed with PBS, and embedded in 1.5% agar/5% sucrose solution. Agar-sucrose  
664 tissue blocks were flash-frozen in liquid nitrogen and subsequently cryosectioned on a microtome.  
665 Frozen sections were defrosted for 1h at RT then incubated overnight at 70°C in six1b probe (provided  
666 by Vladimir Korzh, Institute of Medical and Cellular Biology, A\*STAR, Proteos, Singapore) diluted  
667 1μg/ml in hybridization buffer (1X SSC buffer, 50% formamide, 10% dextran sulfate, 1mg/ml yeast  
668 tRNA, 1X Denhardt's). Sections were then washed 3x30min at 70°C (Wash: 1X Saline Sodium Citrate  
669 (SSC) buffer, 50% formamide, 0.1% Tween-20) followed by 3x10min at RT in MABT (1X maleic acid  
670 buffer, 20% Tween-20), and incubated 2 hours in blocking solution (MABT, 20% sheep serum, 10%  
671 Boehringer Blocking Reagent). Sections were then incubated overnight at RT in 1:2000 anti-digoxigenin  
672 antibody diluted in blocking solution, washed 4x20min at RT in MABT, then 2x10min wash in AP  
673 staining buffer (100mM NaCl, 50mM MgCl<sub>2</sub>, 100mM Tris pH9.5, 0.1% Tween-20), and stained

674 overnight at 37°C in 3.5µl/ml nitro-blue tetrazolium (NBT), 2.6µl/ml 5-bromo-4-chloro-3'-  
675 indolyphosphate (BCIP), 10% polyvinyl alcohol in AP staining buffer). Slides were rinsed 2X in  
676 PBS+0.1% Tween-20, 2X in ddH<sub>2</sub>O, dehydrated through ethanol solutions, cleared in xylene and  
677 coverslipped in Permount.

678

### 679 **Whole-mount zebrafish embryo *in situ* hybridization**

680 Whole-mount RNA *in situ* hybridization in zebrafish embryos was performed as previously described<sup>77</sup>.  
681 DIG-conjugated antisense probes (gifts from Simon Hughes' lab) were T7 or T3 transcribed for *pax3a*,  
682 *myod1*, and *myogenin* from pCS2+ backbone plasmids. *Post-hoc* genotyping of ISH-stained embryos  
683 was performed by incubating single embryos in 300mM NaCl overnight at 65°C to reverse crosslinks.  
684 DNA was purified from each embryo by phenol-chloroform extraction and genotyped as described  
685 previously<sup>11</sup>.

686

### 687 **Cell Culture and Cell lines**

688 FP-RMS and FN-RMS cell lines used in this study were a generous donation from Dr. Mark Hatley. Cell  
689 lines manipulated in this study (SMS-CTR and RD) were maintained at 37°C and 5% CO<sub>2</sub> in Dulbecco's  
690 Modified Eagle Medium (DMEM) supplemented with 10% FBS and 1% penicillin/streptomycin. Cell  
691 lines were tested for mycoplasma (Lonza MycoAlert) at least twice per year and only mycoplasma-  
692 negative cell lines were used in this study. All cell lines were STR authenticated by the University of  
693 Colorado Cancer Center Tissue Culture shared resource.

694

695 Stable SIX1 KD was achieved in SMS-CTR and RD cell lines by lentiviral transduction of two pLKO.1-  
696 derived shRNAs targeting the SIX1 CDS, subsequently denoted throughout the text as SIX1 KD5 and  
697 KD6. Control pLKO.1 shScramble cells were also transduced alongside SIX1 KD cells. pLKO.1 shRNA  
698 plasmids were transfected into HEK293T cells (293T) along with pMD2G and psPAX2 envelope and  
699 packaging plasmids. Viral particles were collected from 293T cells 48-hours post-transfection, passed

700 through a 0.45 $\mu$ m filter syringe, and treated with 6-8 $\mu$ g of polybrene prior to infecting target cells. 24-  
701 hours post-viral infection, cells were selected with 2.0 $\mu$ g/mL (SMS-CTR) or 1.0 $\mu$ g/mL (RD) puromycin  
702 in 10% FBS/DMEM for 1 week and maintained in half the aforementioned puromycin dose for  
703 remaining experiments.

704

### 705 **IncuCyte Cell Growth Assay**

706 RMS cell growth was measured on an IncuCyte Zoom (Essen Bioscience) Live-Cell Analysis platform.  
707 For cell growth, cells were plated at a concentration of 2500 cells/well in a 96-well plate and imaged  
708 every 12 hours with a 4X objective. Cell growth was measured by percent confluence and results  
709 presented in this study are normalized to percent confluence at time point zero (% Confluence to  
710 Baseline).

711

### 712 **qRT-PCR**

713 Cells were harvested for RNA using the Zymo Direct-zol RNA isolation kit and cDNA was synthesized  
714 using the Bio-rad iScript reverse transcription kit following manufacturer's instructions. Real-time qPCR  
715 was performed using Bio-rad ssoFast Evagreen supermix on a Biorad CFX96 qPCR instrument. SYBR  
716 primers used in this study are detailed in Supplementary Table S1.1.

717

718 Zebrafish tissues were snap-frozen in Trizol reagent, allowed to thaw, and homogenized using a plastic  
719 pestle. Homogenized tissue was then harvested for RNA using the Zymo Direct-zol kit. cDNA was  
720 synthesized using the ThermoFisher Verso cDNA Synthesis kit and qPCR reactions were performed  
721 using Taqman Gene Expression Master mix on an Applied Biosystems StepOnePlus instrument.  
722 Taqman probes used in this study are detailed in Supplemental Table S1.3.

723

### 724 **Western Blotting**

725 Whole cell protein extracts were harvested by lysing cells in RIPA buffer treated with protease inhibitors  
726 and further lysed via sonification. 20-50µg of whole cell lysates were boiled with sample buffer and run  
727 through a 10% polyacrylamide gel. After PAGE gel electrophoresis, gels were transferred onto PVDF  
728 membranes, blocked in 5% Milk/TBST, and incubated with primary antibodies diluted in 5%BSA/TBST  
729 overnight at 4°C. Blots were incubated with HRP-conjugated secondary antibodies raised against  
730 primary antibody species at a 1:1000 dilution and chemiluminescence detected with Pierce ECL  
731 Western Blotting substrate. Chemiluminescence was imaged using an OdysseyFc imaging instrument.  
732 Between all antibody incubations, blots were washed with 1X TBST.

733

### 734 **Immunocytochemistry**

735 Cells were plated on 4-well chamber slide and fixed in 4% PFA/PBS for 10 minutes and permeabilized  
736 in 0.1% TritonX-100/PBS (PBST) for 30 minutes. Chamber slides were next blocked with 15% goat  
737 serum/PBST for one hour and incubated in primary antibody solution overnight. The following day,  
738 chamber slides were incubated with appropriate fluorophore-conjugated secondary antibodies and  
739 mounted with Vectashield mounting medium with DAPI counterstain. All washes between incubation  
740 steps were performed with 1X PBS. Mounted slides were imaged on an Olympus BX51 fluorescence  
741 microscope. For pH3 and myHC stains, staining was quantified by dividing the number of positively  
742 stained cells by the total number of nuclei per field of view. Multinucleated events or fusion indices were  
743 quantified by counting the number of nuclei enclosed within a single positively stained myHC unit. For  
744 all immunocytochemistry stains, data is represented as image measurements taken over at least three  
745 independent experiments with two or more biological replicates per experiment, and two or more fields  
746 of view per biological replicate.

747

### 748 **Mouse Studies**

749 All mouse studies were performed in 6-8 week old immunodeficient NOD/SCID $\gamma$  (NSG) of mixed  
750 genders. For mouse xenograft experiments,  $2 \times 10^5$  cells suspended in a 200µL 1:1 matrigel:1X PBS

751 suspension were subcutaneously injected into either the left or right flank of the mouse, with each  
752 mouse receiving both a shScramble and SIX1 KD injection on one flank. Tumor growth was measured  
753 weekly for 12 weeks using calipers or until tumors surpassed a tumor volume of 1000 mm<sup>3</sup> (1cm<sup>3</sup>). All  
754 animal studies were performed according to protocols approved by the University of Colorado  
755 Institutional Animal Care and Use Committee.

756

### 757 **Immunohistochemistry**

758 For zRMS studies, tumor-burdened fish were euthanized in ice-water, fixed in 4%PFA overnight at 4°C,  
759 washed in PBS for 24 hours, decalcified in 20% EDTA pH 8.0 for 24 hours, dehydrated in 70% EtOH,  
760 and paraffin-embedded. Paraffin-embedded tissues were cut into 10-15µm thick sections and stained  
761 with H&E or further processed for antibody staining.

762

763 For mouse xenografts following dissection, mouse tumor tissue was fixed in 4% PFA overnight, washed  
764 in PBS for 24 hours, and dehydrated in 70% EtOH prior to paraffin-embedding. For all downstream  
765 IHC stains (zRMS, mouse xenograft, human tissue array), slides were de-paraffinized and retrieved in  
766 either pH6 (Six1, myHC) or pH9 (Pax7) Tris/EDTA buffer. Slides were then peroxidase blocked with 3%  
767 hydrogen peroxide (in methanol) for 10min, blocked in serum-free blocking reagent (DAKO) and  
768 incubated with primary antibodies for 1hr at room temperature. Appropriate species' secondary  
769 antibodies were then incubated for 30min and developed with DAB stain for 10min and counterstained  
770 with hematoxylin for another 8min.

771

### 772 **RNA sequencing and Analysis**

773 Total RNA was isolated from SMS-CTR cells using the Zymo Direct-zol RNA Miniprep Kit and RNA  
774 integrity confirmed using TapeStation analysis. shScramble and SIX1 KD SMS-CTR RNA samples  
775 were submitted as biological triplicates except for SIX1 KD6 which was submitted as biological  
776 duplicates on account of its marked proliferative defects. 100ng of total RNA per sample was used to

777 construct PolyA-selected RNA libraries for RNAseq and sequenced using paired end reads with 150  
778 cycles on an Illumina NovaSEQ 6000 instrument. Read QC was performed using fastqc and reads  
779 were trimmed with BBDuk to remove Illumina adapter sequences and the first 12 bases on the 5' ends.  
780 Trimmed fastqc files were aligned to the hg38 human reference genome and aligned counts per gene  
781 were quantified using STAR<sup>65</sup>. Differential gene analysis was performed using the edgeR package<sup>66</sup>.  
782 Gene Set Enrichment Analysis (GSEA) was performed under default settings using the clusterProfiler R  
783 package gseaplot function<sup>67</sup>. Normalized counts (CPM) were converted to z-scores prior to plotting and  
784 heatmaps were created using the pheatmap R package ([https://CRAN.R-](https://CRAN.R-project.org/package=pheatmap)  
785 [project.org/package=pheatmap](https://CRAN.R-project.org/package=pheatmap)).

786

### 787 **Chromatin Immunoprecipitation (ChIPseq)**

788 Human cells along with spike-in Drosophila S2 cells at a 1:10 ratio with human cells were fixed in 1%  
789 formaldehyde diluted in growth media for an incubation time of 15 minutes. Crosslinking was quenched  
790 with the direct addition of 1M Tris pH 7.5 and shaking for 15 minutes. Cells were gently scraped off  
791 plates, pelleted by centrifugation, washed in cold PBS and centrifuged again. Cell pellets were snap  
792 frozen in liquid nitrogen and nuclei were extracted from cell pellets (Sigma Nuclei Isolation Kit #NUC-  
793 101). Chromatin was fragmented in sonication buffer (50mM HEPES pH 7.5, 140mM NaCl, 1mM EDTA,  
794 1mM EGTA, 1% Triton-X, 0.1% Sodium deoxycholate, 0.1% SDS) supplemented with protease inhibitor  
795 cocktail using a Branson digital sonifier instrument at 4°C with the following settings: 7 cycles of 30s ON  
796 and 1m OFF sonification at 50% intensity. Chromatin lysates were incubated with 10µg antibody-bound  
797 Dynabeads (Dynabeads: Fisher Scientific #14-311-D; see supplemental materials for antibody  
798 information) overnight and subsequently washed in buffers of increasing stringency: 2X sonication  
799 buffer, 1X high salt sonication buffer (sonication buffer with 500mM NaCl), 1X LiCl buffer (20mM Tris  
800 pH 8.0, 1mM EDTA, 250mM LiCl, 0.5% NP-40, 0.5% sodium deoxycholate), and 1X TE pH 8.0.  
801 Immunocomplexes were eluted in 1% SDS/TE buffer and transferred to Lobind DNA tubes (Eppendorf  
802 #13-698-790) at 65°C for 30 minutes and crosslinks were reversed overnight by incubating samples at

803 65°C. RNA and protein were digested by the addition of RNase and Proteinase K, and DNA fragments  
804 were finally purified using phenol-chloroform. ChIPseq libraries were assembled using the KAPA  
805 HyperPrep ChIP library kit following manufacturer's settings and were sequenced on an Illumina  
806 Nextseq500 machine.

807

## 808 **CUT&RUN**

809 500,000 cells/sample were harvested by scraping and were resuspended and washed twice in wash  
810 buffer supplemented with protease inhibitor cocktail (20mM HEPES pH 7.5, 150mM NaCl, 0.5mM  
811 Spermidine). Cells were adsorbed onto activated Concavalin A beads for 10 minutes and then  
812 incubated with antibodies O/N at 4°C. After antibody incubation, unbound antibodies were washed  
813 away with cold Digitonin buffer (wash buffer + 0.01% Digitonin) and pAG-MNase was added to each  
814 sample to produce chromatin fragments under targets for 10 minutes at room temperature. Cells were  
815 then cooled to 0°C and incubated with ice cold 100mM CaCl<sub>2</sub> for 2 hours at 4°C. MNase digestion was  
816 terminated with the addition of a master mix of STOP buffer (340mM NaCl, 20mM EDTA, 4mM EGTA,  
817 50ug/mL RNaseA, 50µg/mL Glycogen) and 0.5ng/ul *E.coli* spike-in DNA and incubated for 10 minutes  
818 at 37°C. DNA was finally purified using a column purification kit and subsequently used for library  
819 assembly. Antibody concentrations: 1:100 for rabbit IgG and 1:50 for MYOD1. CUT&RUN libraries were  
820 assembled using the NEBNext II Ultra Library Prep kit) and dual-index primers following manufacturer  
821 protocols. Library size distribution was assessed by TapeStation and libraries were subsequently used  
822 for CUT&RUN qPCR.

823

## 824 **ChIPseq Analysis**

825 The quality of the fastq files was accessed using FastQC  
826 (<https://www.bioinformatics.babraham.ac.uk/projects/>) and MultiQC<sup>78</sup>. Illumina adapters and low-quality  
827 reads were filtered out using BBDuk (<http://jgi.doe.gov/data-and-tools/bb-tools>). Bowtie2 (v.2.3.4.3) was

828 used to align the sequencing reads to the hg38 reference human genome and to the dm6 drosophila  
829 reference genome<sup>69</sup>. Samtools (v.1.11) was used to select the mapped reads (samtools view -b - q 30)  
830 and sort the bam files<sup>70</sup>. PCR duplicates were removed using Picard MarkDuplicates tool  
831 (<http://broadinstitute.github.io/picard/>). The normalization ratio of each sample was calculated by  
832 dividing the total number of mapped reads mapping to the Drosophila genome of each sample by the  
833 total number of mapped reads mapping to the Drosophila genome of the sample with the lowest  
834 number of reads. Using the normalization ratio, random sub-sampling of the reads was performed using  
835 samtools view -hs. Bedtools genomecov was used to create bedgraph files from the bam files<sup>71</sup>. Peaks  
836 were called using MACS2 (v2.1.2) with default parameters for narrow peaks (--gsize hs --qvalue 0.01)<sup>72</sup>.  
837 Average profiles were generated using ngs.plot<sup>74</sup> and heatmaps were generated using bigwig files with  
838 deepTools<sup>75</sup>. ChIP peaks were annotated using the ChIPseeker R package<sup>73</sup>. Super-enhancers were  
839 identified using the Ranking Ordering of Super-Enhancer (ROSE) algorithm using default  
840 parameters<sup>29,30</sup> and hockey stick plots were generated in R. ChIPseq track figures were generated  
841 using the Washington University Epigenome Browser<sup>79</sup>.

842

### 843 **Statistical Analysis**

844 For all cell line experiments, experiments were performed in at least three independent biological  
845 experiments with biological replicates and reported in this manuscript as a composite of these biological  
846 replicates. Therefore, when applicable, error bars for all figures including both cell line and animal  
847 experiments depict standard error of the mean (SEM). For all zebrafish experiments, an unpaired two-  
848 sided Student's *t*-test was used to compare wildtype/control measurements to that of *six1b*<sup>-/-</sup> sibling or  
849 appropriately age-matched tumor tissue. For all cell line data, statistical differences between control  
850 and SIX1 KD conditions were measured using an unpaired two-sided Student's *t*-test, unless specified  
851 otherwise in the figure legends. For animal experiments (both zebrafish and mouse) comparing tumor  
852 growth over time (Figure 2 & 3), tumor growth data were fitted to a Longitudinal Mixed Effect model and  
853 tumor growth was compared between shScramble and SIX1 KD mouse groups or wildtype and *six1b*



854 mutant fish groups. Throughout this manuscript, all  $p$ -values are reported as is on figures or in figure  
855 legends.

856

### 857 **Acknowledgments:**

858 We would like to thank Dr. Brian Abraham for assistance with ChIPseq analysis and Erin Binne, Virginia  
859 Ware, and Taylor Hotz for their assistance throughout this project. We would also like to acknowledge a  
860 number of undergraduates whose help over the years contributed to this body of work: Julia Torline,  
861 Aaron Clark, Oscar Yip, and Hope Eden. This work was generously supported by NIH grants  
862 R21CA201809 (to H.L.F and K.B.A), R01CA224867 (to H.L.F), R01CA183874 (to P.J), K08CA245251  
863 (to A.D.D), the Alex's Lemonade Stand Foundation Innovation Award (to H.L.F), the CU Cancer Center  
864 Molecular and Cellular Oncology Pilot Grant P30CA046934 (to H.L.F, K.B.A, and P.J), and training  
865 fellowships T32GM763538 and TL1TR001081 (to J.Y.H). This work utilized the Cell Technologies,  
866 Functional Genomics, Pathology, and Biostatistics and Bioinformatics Shared Resource supported by  
867 P30CA046934 (to the University of Colorado Cancer Center). Research reported was also supported  
868 by the NIH/NCI P30CA021765 (to St. Jude Children's Research Hospital Comprehensive Cancer  
869 Center), CureSearch for Children's Cancer Foundation, Rally Foundation for Childhood Cancer  
870 Research, and the American Lebanese Syrian Associated Charities (to A.D.D and S.N).

871

### 872 **Diversity and Inclusion Statement:**

873 We worked to ensure sex balance/diversity in experimental samples through the selection of the cell  
874 lines, selection of non-human subjects, and selection of the genomic datasets (all which contained both  
875 male and female samples). The author list of this paper includes contributors from the location where  
876 the research was conducted who participated in the data collection, design, analysis, and/or  
877 interpretation of the work.

878

### 879 **Declaration of Interests:**

880 J.C.C is a co-founder of PrecisionProfile. H.L.F is a co-founder of Sieyax, LLC.

881

882 **References:**

- 883 1. Rekhi, B. *et al.* Clinicopathologic features of 300 rhabdomyosarcomas with emphasis upon differential  
884 expression of skeletal muscle specific markers in the various subtypes: A single institutional experience.  
885 *Ann. Diagn. Pathol.* **36**, 50–60 (2018).
- 886 2. Weintraub, H. *et al.* Activation of muscle-specific genes in pigment, nerve, fat, liver, and fibroblast cell lines  
887 by forced expression of MyoD. *Proc. Natl. Acad. Sci. U. S. A.* **86**, 5434–5438 (1989).
- 888 3. MacQuarrie, K. L. *et al.* Comparison of Genome-Wide Binding of MyoD in Normal Human Myogenic Cells  
889 and Rhabdomyosarcomas Identifies Regional and Local Suppression of Promyogenic Transcription  
890 Factors. *Mol. Cell. Biol.* **33**, 773–784 (2013).
- 891 4. Londhe, P. & Davie, J. K. Sequential association of myogenic regulatory factors and E proteins at muscle-  
892 specific genes. *Skelet. Muscle* **1**, 14 (2011).
- 893 5. Yang, Z. *et al.* MyoD and E-protein heterodimers switch rhabdomyosarcoma cells from an arrested  
894 myoblast phase to a differentiated state. *Genes Dev.* **23**, 694–707 (2009).
- 895 6. Cheyette, B. N. R. *et al.* The drosophila sine oculis locus encodes a homeodomain-containing protein  
896 required for the development of the entire visual system. *Neuron* **12**, 977–996 (1994).
- 897 7. Laclef, C. *et al.* Altered myogenesis in Six1-deficient mice. 2239–2252 (2003). doi:10.1242/dev.00440
- 898 8. Grifone, R. *et al.* Six1 and Six4 homeoproteins are required for Pax3 and Mrf expression during  
899 myogenesis in the mouse embryo. (2004). doi:10.1242/dev.01773
- 900 9. Lin, C. Y. *et al.* The transcription factor Six1a plays an essential role in the craniofacial myogenesis of  
901 zebrafish. *Dev. Biol.* **331**, 152–166 (2009).
- 902 10. Nord, H., Nygård Skalmann, L. & von Hofsten, J. Six1 regulates proliferation of Pax7-positive muscle  
903 progenitors in zebrafish. *J. Cell Sci.* **126**, 1868–80 (2013).
- 904 11. Talbot, J. C. *et al.* Muscle precursor cell movements in zebrafish are dynamic and require six- family genes.  
905 (2019). doi:10.1242/dev.171421
- 906 12. Zammit, P. S. Function of the myogenic regulatory factors Myf5, MyoD, Myogenin and MRF4 in skeletal  
907 muscle, satellite cells and regenerative myogenesis. *Semin. Cell Dev. Biol.* **72**, 19–32 (2017).
- 908 13. Soleimani, V. D. *et al.* Snail Regulates MyoD Binding-Site Occupancy to Direct Enhancer Switching and  
909 Differentiation-Specific Transcription in Myogenesis. *Mol. Cell* **47**, 457–468 (2012).

- 910 14. Cao, Y. *et al.* Genome-wide MyoD Binding in Skeletal Muscle Cells: A Potential for Broad Cellular  
911 Reprogramming. *Dev. Cell* **18**, 662–674 (2010).
- 912 15. Spitz, F. *et al.* Expression of myogenin during embryogenesis is controlled by Six/sine oculis  
913 homeoproteins through a conserved MEF3 binding site. *Proc. Natl. Acad. Sci. U. S. A.* **95**, 14220–14225  
914 (1998).
- 915 16. Santolini, M. *et al.* MyoD reprogramming requires Six1 and Six4 homeoproteins: genome-wide cis-  
916 regulatory module analysis. *Nucleic Acids Res.* **44**, 8621–8640 (2016).
- 917 17. Relaix, F. *et al.* Six Homeoproteins Directly Activate Myod Expression in the Gene Regulatory Networks  
918 That Control Early Myogenesis. *PLoS Genet.* **9**, (2013).
- 919 18. Dharia, N. V. *et al.* A first-generation pediatric cancer dependency map. *Nat. Genet.* (2021).  
920 doi:10.1038/s41588-021-00819-w
- 921 19. Langenau, D. M. *et al.* Effects of RAS on the genesis of embryonal rhabdomyosarcoma. *Genes Dev.* **21**,  
922 1382–1395 (2007).
- 923 20. Sokolowski, E., Turina, C. B., Kikuchi, K., Langenau, D. M. & Keller, C. Proof-of-concept rare cancers in  
924 drug development: the case for rhabdomyosarcoma. 1–13 (2013). doi:10.1038/onc.2013.129
- 925 21. Hinson, A. R. P. *et al.* Human Rhabdomyosarcoma Cell Lines for Rhabdomyosarcoma Research: Utility  
926 and Pitfalls. *Front. Oncol.* **3**, 1–12 (2013).
- 927 22. Altevogt, P., Doberstein, K. & Fogel, M. L1CAM in human cancer. *Int. J. Cancer* **138**, 1565–1576 (2016).
- 928 23. Katoh, Y. & Katoh, M. Hedgehog signaling, epithelial-to-mesenchymal transition and miRNA. *Int. J. Mol.*  
929 *Med.* **22**, 271–275 (2008).
- 930 24. Lo, H. W. *et al.* Epidermal growth factor receptor cooperates with signal transducer and activator of  
931 transcription 3 to induce epithelial-mesenchymal transition in cancer cells via up-regulation of TWIST gene  
932 expression. *Cancer Res.* **67**, 9066–9076 (2007).
- 933 25. Subramanian, A. *et al.* Gene set enrichment analysis: A knowledge-based approach for interpreting  
934 genome-wide expression profiles. *Proc. Natl. Acad. Sci. U. S. A.* **102**, 15545–15550 (2005).
- 935 26. Micalizzi, D. S. *et al.* The Six1 homeoprotein induces human mammary carcinoma cells to undergo  
936 epithelial-mesenchymal transition and metastasis in mice through increasing TGF-beta signaling. *J. Clin.*  
937 *Invest.* **119**, 2678–90 (2009).

- 938 27. Mccoy, E. L. *et al.* Six1 expands the mouse mammary epithelial stem / progenitor cell pool and induces  
939 mammary tumors that undergo epithelial- mesenchymal transition. **119**, 2663–2677 (2009).
- 940 28. Leikina, E. *et al.* Myomaker and Myomerger Work Independently to Control Distinct Steps of Membrane  
941 Remodeling during Myoblast Fusion. *Dev. Cell* 1–14 (2018). doi:10.1016/j.devcel.2018.08.006
- 942 29. Whyte, W. A. *et al.* Master transcription factors and mediator establish super-enhancers at key cell identity  
943 genes. *Cell* **153**, 307–319 (2013).
- 944 30. Lovén, J. *et al.* Selective inhibition of tumor oncogenes by disruption of super-enhancers. *Cell* **153**, 320–  
945 334 (2013).
- 946 31. Noguchi, Y. T. *et al.* Cell-autonomous and redundant roles of Hey1 and HeyL in muscle stem cells: HeyL  
947 requires HeS1 to bind diverse DNA sites. *Dev.* **146**, 1–12 (2019).
- 948 32. Qamar, L. *et al.* Specificity and prognostic validation of a polyclonal antibody to detect Six1 homeoprotein  
949 in ovarian cancer. *Gynecol. Oncol.* **125**, 451–457 (2012).
- 950 33. Shi, J. *et al.* Requirement of the fusogenic micropeptide myomixer for muscle formation in zebrafish. *Proc.*  
951 *Natl. Acad. Sci. U. S. A.* **114**, 11950–11955 (2017).
- 952 34. Skene, P. J. & Henikoff, S. An efficient targeted nuclease strategy for high-resolution mapping of DNA  
953 binding sites. *Elife* **6**, e21856 (2017).
- 954 35. Li, S. *et al.* Twist2 amplification in rhabdomyosarcoma represses myogenesis and promotes oncogenesis  
955 by redirecting MyoD DNA binding. *Genes Dev.* **33**, 626–640 (2019).
- 956 36. Pomella, S. *et al.* Interaction between SNAI2 and MYOD enhances oncogenesis and suppresses  
957 differentiation in Fusion Negative Rhabdomyosarcoma. *Nat. Commun.* **12**, 1–15 (2021).
- 958 37. Choi, I. Y. *et al.* Transcriptional landscape of myogenesis from human pluripotent stem cells reveals a key  
959 role of TWIST1 in maintenance of skeletal muscle progenitors. *Elife* **9**, 1–27 (2020).
- 960 38. Hsiao, T. H. *et al.* Utilizing-score to identify oncogenic pathways of cholangiocarcinoma. *Transl. Cancer*  
961 *Res.* **2**, 6–17 (2013).
- 962 39. Liu, Z. *et al.* CASZ1 induces skeletal muscle and rhabdomyosarcoma differentiation through a feed-  
963 forward loop with MYOD and MYOG. *Nat. Commun.* **11**, (2020).
- 964 40. Hayes, M. N. *et al.* Vangl2/RhoA Signaling Pathway Regulates Stem Cell Self-Renewal Programs and  
965 Growth in Rhabdomyosarcoma. *Cell Stem Cell* **22**, 414-427.e6 (2018).

- 966 41. Tenente, I. M. *et al.* Myogenic regulatory transcription factors regulate growth in rhabdomyosarcoma. *Elife*  
967 **6**, (2017).
- 968 42. Phelps, M. P., Bailey, J. N., Vleeshouwer-Neumann, T. & Chen, E. Y. CRISPR screen identifies the  
969 NCOR/HDAC3 complex as a major suppressor of differentiation in rhabdomyosarcoma. *Proc. Natl. Acad.*  
970 *Sci. U. S. A.* **113**, 15090–15095 (2016).
- 971 43. An, Y. *et al.* A Molecular Switch Regulating Cell Fate Choice between Muscle Progenitor Cells and Brown  
972 Adipocytes. *Dev. Cell* **41**, 382-391.e5 (2017).
- 973 44. Rudnicki, M. A. *et al.* MyoD or Myf-5 is required for the formation of skeletal muscle. *Cell* **75**, 1351–1359  
974 (1993).
- 975 45. Berti, F. *et al.* Time course and side-by-side analysis of mesodermal, pre-myogenic, myogenic and  
976 differentiated cell markers in the chicken model for skeletal muscle formation. *J. Anat.* **227**, 361–382  
977 (2015).
- 978 46. O'Brien, J. H., Hernandez-Lagunas, L., Artinger, K. B. & Ford, H. L. MicroRNA-30a regulates zebrafish  
979 myogenesis through targeting the transcription factor Six1. *J. Cell Sci.* **127**, 2291–2301 (2014).
- 980 47. Yu, Y. *et al.* Expression profiling identifies the cytoskeletal organizer ezrin and the developmental  
981 homeoprotein Six-1 as key metastatic regulators. *Nat. Med.* **10**, 175–181 (2004).
- 982 48. Yu, Y., Davicioni, E., Triche, T. J. & Merlino, G. The Homeoprotein Six1 Transcriptionally Activates Multiple  
983 Protumorigenic Genes but Requires Ezrin to Promote Metastasis. 1982–1989 (2006). doi:10.1158/0008-  
984 5472.CAN-05-2360
- 985 49. Grand, F. Le *et al.* Six1 regulates renewal during skeletal muscle regeneration. *J. Cell Biol.* **198**, 815–832  
986 (2012).
- 987 50. Bessarab, D. A., Chong, S.-W., Srinivas, B. P. & Korzh, V. Six1a is required for the onset of fast muscle  
988 differentiation in zebrafish. *Dev. Biol.* **323**, 216–228 (2008).
- 989 51. McCoy, E. L. *et al.* Six1 expands the mouse mammary epithelial stem/progenitor cell pool and induces  
990 mammary tumors that undergo epithelial-mesenchymal transition. *J. Clin. Invest.* **119**, 2663–77 (2009).
- 991 52. Coletta, R. D. *et al.* The Six1 homeoprotein stimulates tumorigenesis by reactivation of cyclin A1. *Proc.*  
992 *Natl. Acad. Sci. U. S. A.* **101**, 6478–6483 (2004).
- 993 53. Lee, E. J. *et al.* Establishment of stably expandable induced myogenic stem cells by four transcription

- 994 factors. *Cell Death Dis.* **9**, (2018).
- 995 54. Kingsbury, T. J., Kim, M. J. & Civin, C. I. *Regulation of cancer stem cell properties by SIX1, a member of*  
996 *the PAX-SIX-EYA-DACH network. Advances in Cancer Research* **141**, (Elsevier Inc., 2019).
- 997 55. Heinz, S., Romanoski, C. E., Benner, C. & Glass, C. K. The selection and function of cell type-specific  
998 enhancers. *Nat. Rev. Mol. Cell Biol.* **16**, 144–154 (2015).
- 999 56. Khan, J. *et al.* cDNA microarrays detect activation of a myogenic transcription program by the PAX3-FKHR  
1000 fusion oncogene. *Proc. Natl. Acad. Sci.* **96**, 13264–13269 (1999).
- 1001 57. Gryder, B. E. *et al.* Miswired Enhancer Logic Drives a Cancer of the Muscle Lineage. *iScience* **23**, (2020).
- 1002 58. Gryder, B. E. *et al.* Histone hyperacetylation disrupts core gene regulatory architecture in  
1003 rhabdomyosarcoma. *Nat. Genet.* **51**, 1714–1722 (2019).
- 1004 59. Gryder, B. E. *et al.* PAX3-FOXO1 establishes myogenic super enhancers and confers BET bromodomain  
1005 vulnerability. *Cancer Discov.* **7**, 884–899 (2017).
- 1006 60. Farabaugh, S. M., Micalizzi, D. S., Jedlicka, P. & Ford, H. L. Eya2 is Required to Mediate the Pro-  
1007 Metastatic Functions of Six1 via the Induction of TGF- $\beta$  Signaling, Epithelial-to-Mesenchymal Transition,  
1008 and Cancer Stem Cell Properties. *Oncogene* **31**, 552–562 (2012).
- 1009 61. Patrick, A. N. *et al.* Structure-function analyses of the human SIX1-EYA2 complex reveal insights into  
1010 metastasis and BOR syndrome. *Nat. Struct. Mol. Biol.* **20**, 447–53 (2013).
- 1011 62. Li, X. *et al.* Eya protein phosphatase activity regulates Six1–Dach–Eya transcriptional effects in  
1012 mammalian organogenesis. *Nature* **426**, 247–254 (2003).
- 1013 63. Zhou, H. *et al.* Identification of a small-molecule inhibitor that disrupts the SIX1/EYA2 complex, EMT, and  
1014 metastasis. *Cancer Res.* **80**, 2689–2702 (2020).
- 1015 64. Hanna, J. A. *et al.* PAX3-FOXO1 drives miR-486-5p and represses miR-221 contributing to pathogenesis  
1016 of alveolar rhabdomyosarcoma. *Oncogene* **37**, 1991–2007 (2018).
- 1017 65. Dobin, A. *et al.* STAR: ultrafast universal RNA-seq aligner. *Bioinformatics* **29**, 15–21 (2013).
- 1018 66. Robinson, M. D., McCarthy, D. J. & Smyth, G. K. edgeR: a Bioconductor package for differential  
1019 expression analysis of digital gene expression data. *Bioinformatics* **26**, 139–140 (2010).
- 1020 67. Yu, G., Wang, L. G., Han, Y. & He, Q. Y. ClusterProfiler: An R package for comparing biological themes  
1021 among gene clusters. *Omi. A J. Integr. Biol.* **16**, 284–287 (2012).

- 1022 68. Aibar, S. *et al.* SCENIC: single-cell regulatory network inference and clustering. *Nat. Methods* **14**, 1083–  
1023 1086 (2017).
- 1024 69. Langmead, B. & Salzberg, S. L. Fast gapped-read alignment with Bowtie 2. *Nat. Methods* **9**, 357–359  
1025 (2012).
- 1026 70. Li, H. *et al.* The Sequence Alignment/Map format and SAMtools. *Bioinformatics* **25**, 2078–2079 (2009).
- 1027 71. Quinlan, A. R. & Hall, I. M. BEDTools: A flexible suite of utilities for comparing genomic features.  
1028 *Bioinformatics* **26**, 841–842 (2010).
- 1029 72. Zhang, Y. *et al.* Model-based analysis of ChIP-Seq (MACS). *Genome Biol.* **9**, (2008).
- 1030 73. Yu, G., Wang, L. G. & He, Q. Y. ChIP seeker: An R/Bioconductor package for ChIP peak annotation,  
1031 comparison and visualization. *Bioinformatics* **31**, 2382–2383 (2015).
- 1032 74. Shen, L., Shao, N., Liu, X. & Nestler, E. ngs.plot: Quick mining and visualization of next-generation  
1033 sequencing data by integrating genomic databases. *BMC Genomics* **15**, 284 (2014).
- 1034 75. Ramírez, F., Dündar, F., Diehl, S., Grüning, B. A. & Manke, T. deepTools: a flexible platform for exploring  
1035 deep-sequencing data. *Nucleic Acids Res.* **42**, W187–W191 (2014).
- 1036 76. Heinz, S. *et al.* Simple combinations of lineage-determining transcription factors prime cis-regulatory  
1037 elements required for macrophage and B cell identities. *Mol. Cell* **38**, 576–589 (2010).
- 1038 77. Thisse, B. *et al.* Spatial and Temporal Expression of the Zebrafish Genome by Large-Scale In Situ  
1039 Hybridization Screening. in *The Zebrafish: Genetics, Genomics, and Informatics* **77**, 505–519 (Academic  
1040 Press, 2004).
- 1041 78. Ewels, P., Magnusson, M., Lundin, S. & Käller, M. MultiQC: summarize analysis results for multiple tools  
1042 and samples in a single report. *Bioinformatics* **32**, 3047–3048 (2016).
- 1043 79. Zhou, X. *et al.* The Human Epigenome Browser at Washington University. *Nat. Methods* **8**, 989–990  
1044 (2011).
- 1045



# Figure 1. SIX1 is overexpressed and predicted to be an essential gene in Rhabdomyosarcoma

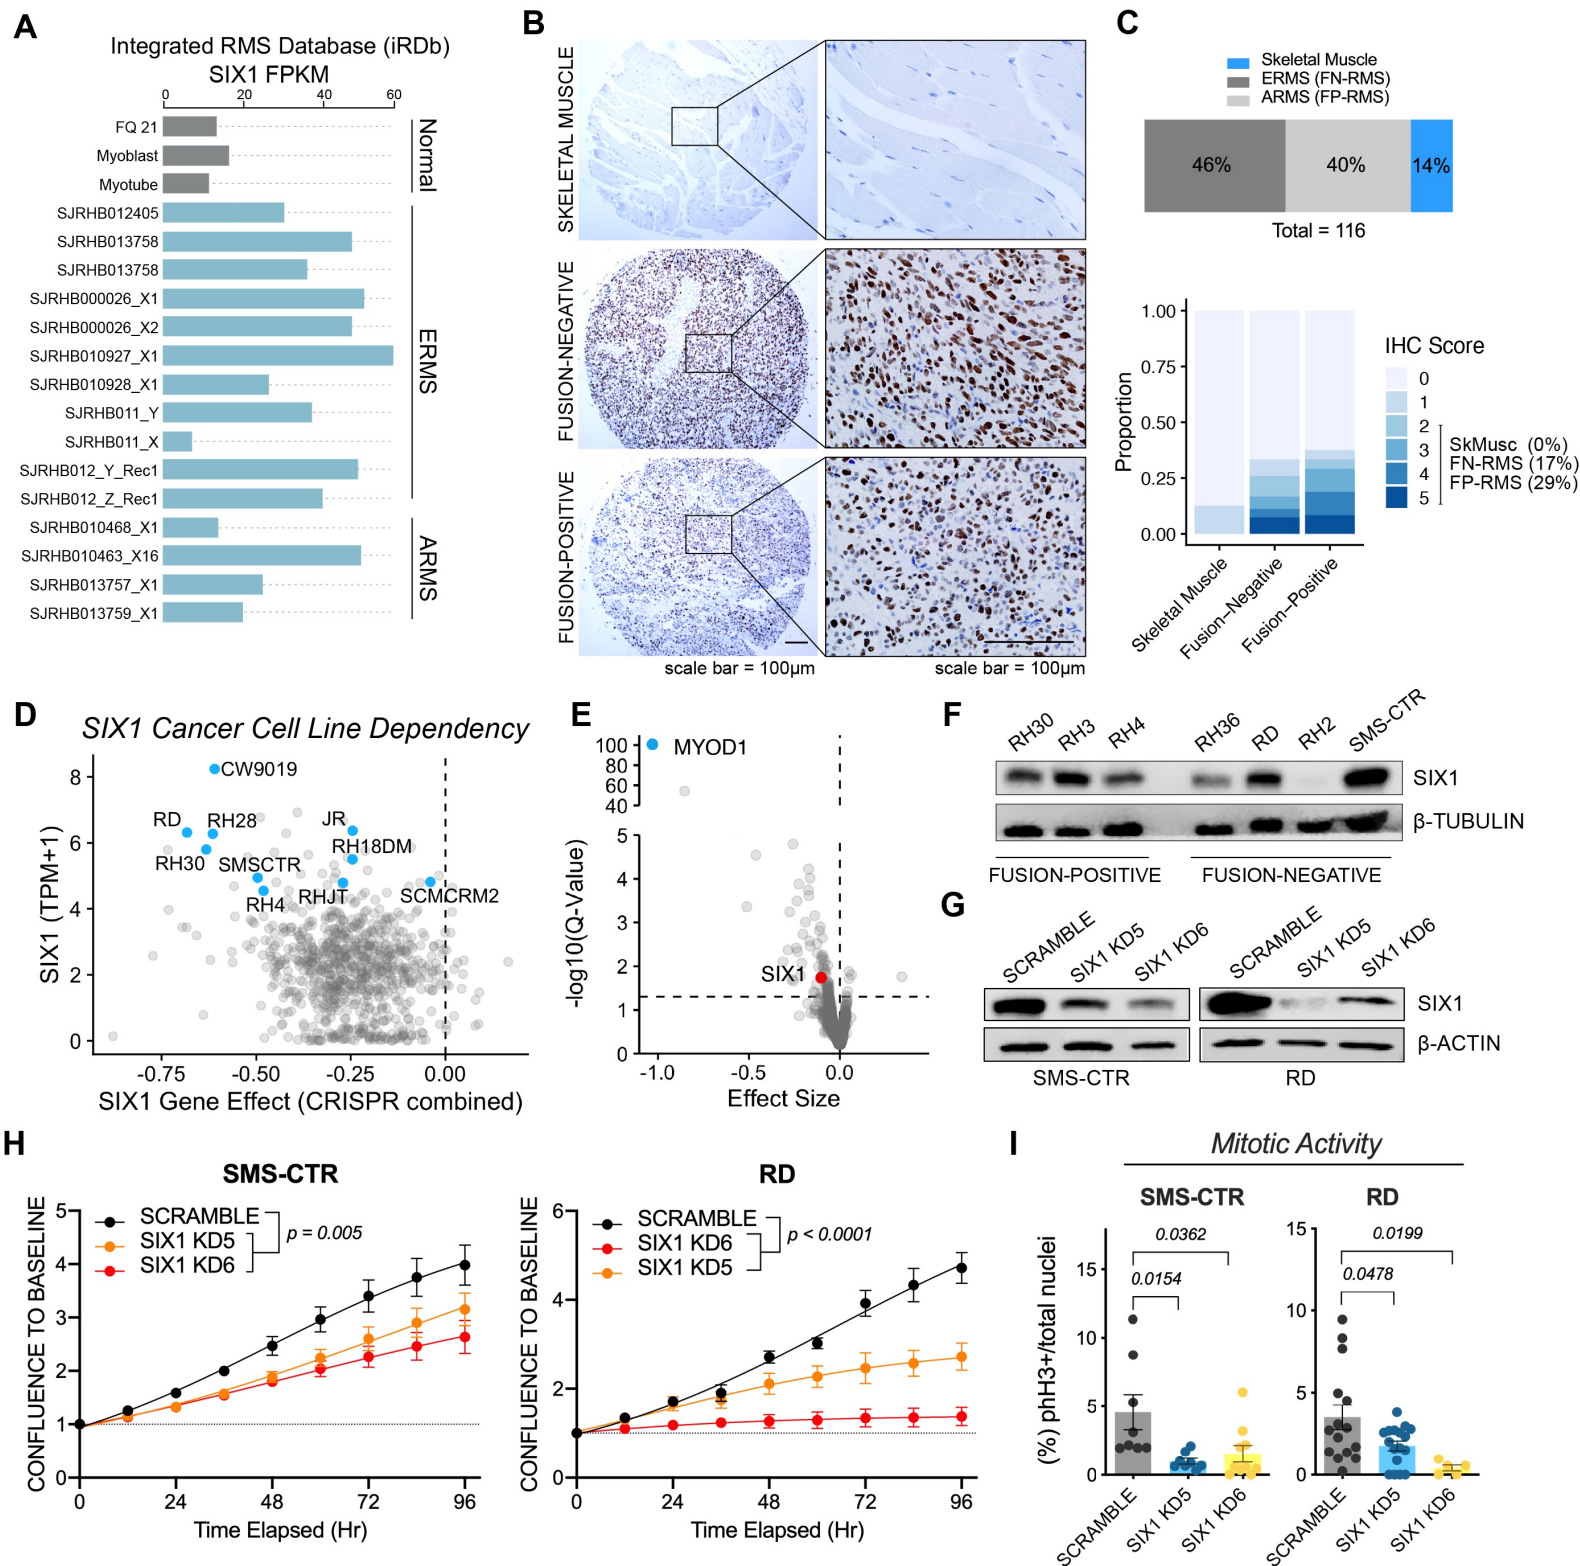

## Figure 2. *six1b* is required for zebrafish RMS tumor growth

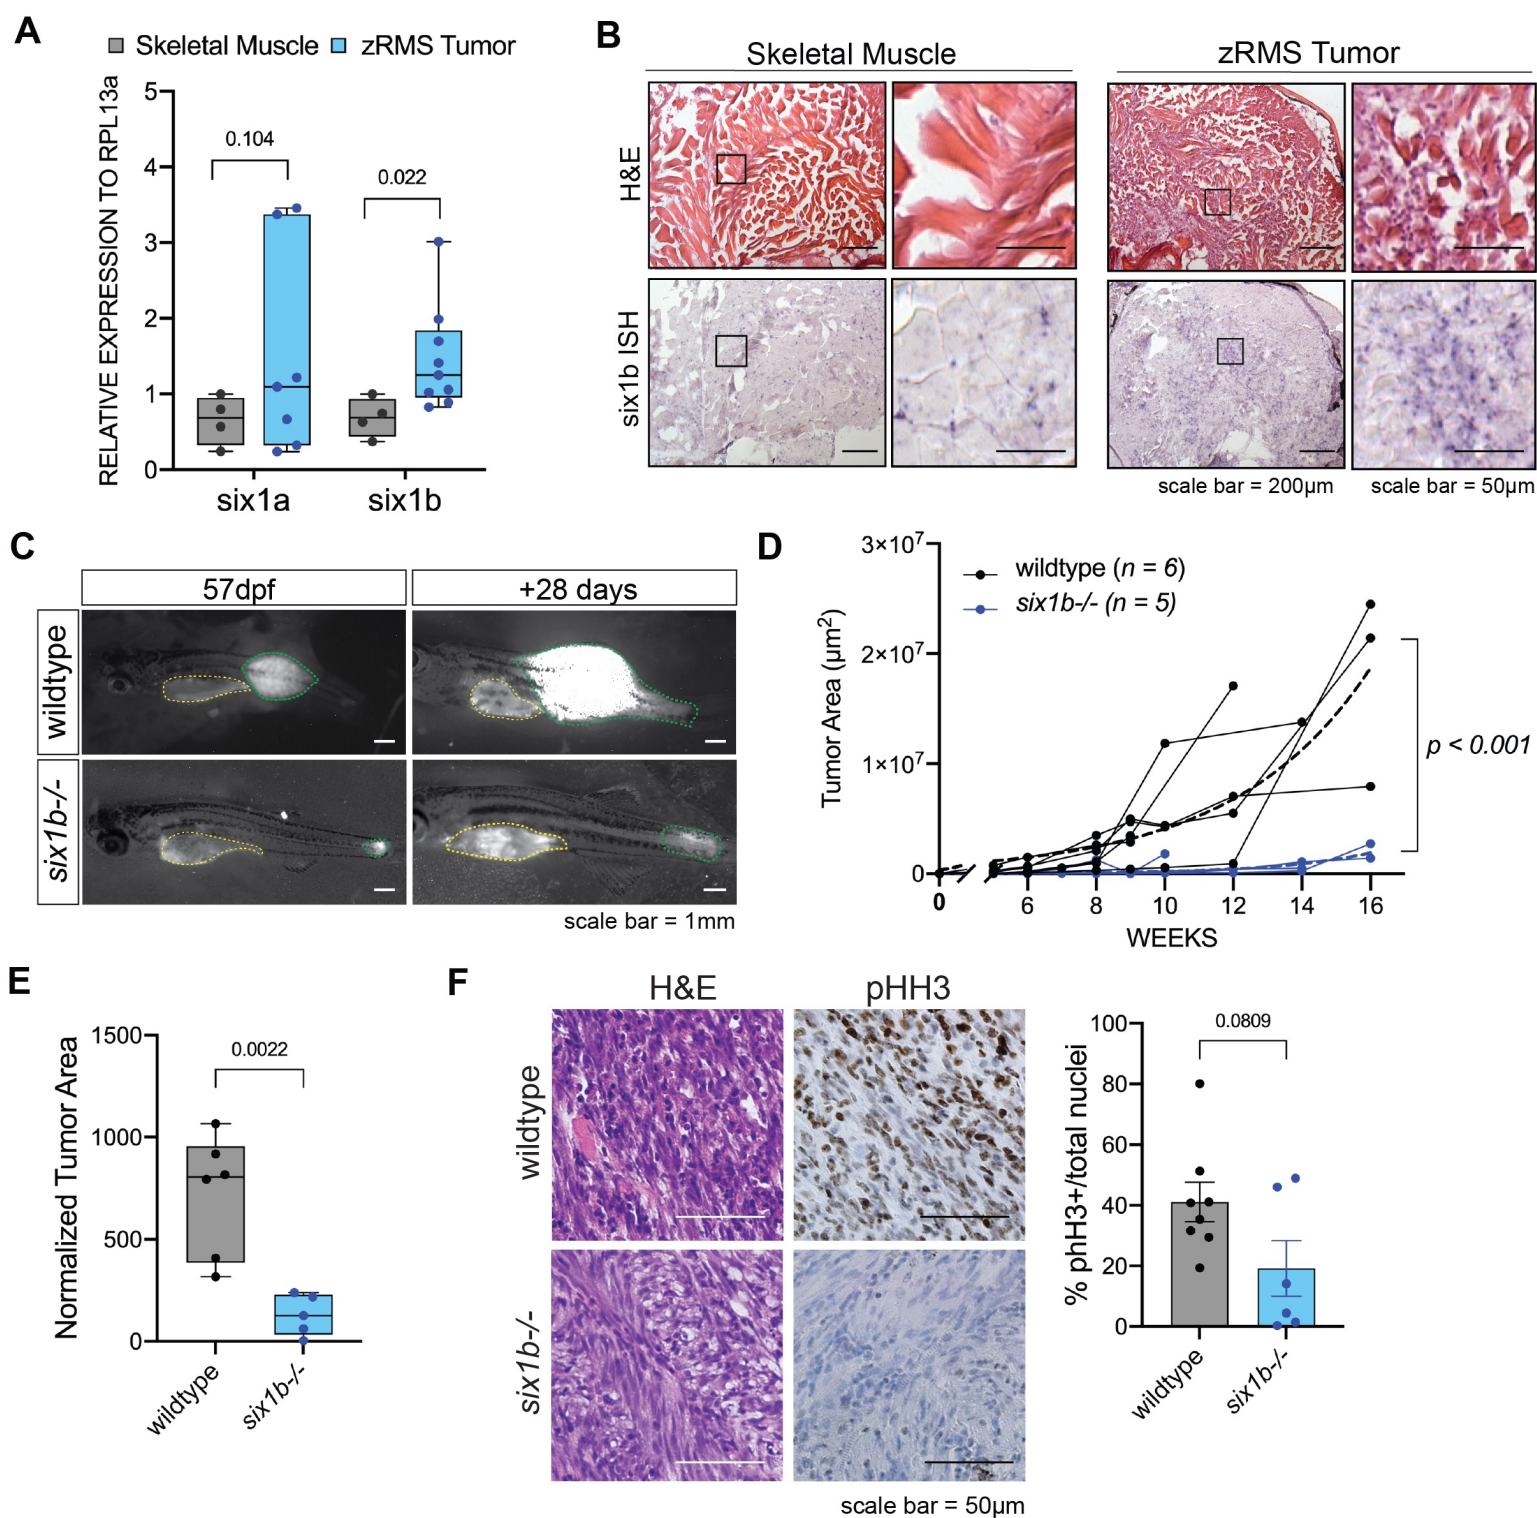



## Figure 3. SIX1 knockdown inhibits human RMS tumor growth and progression

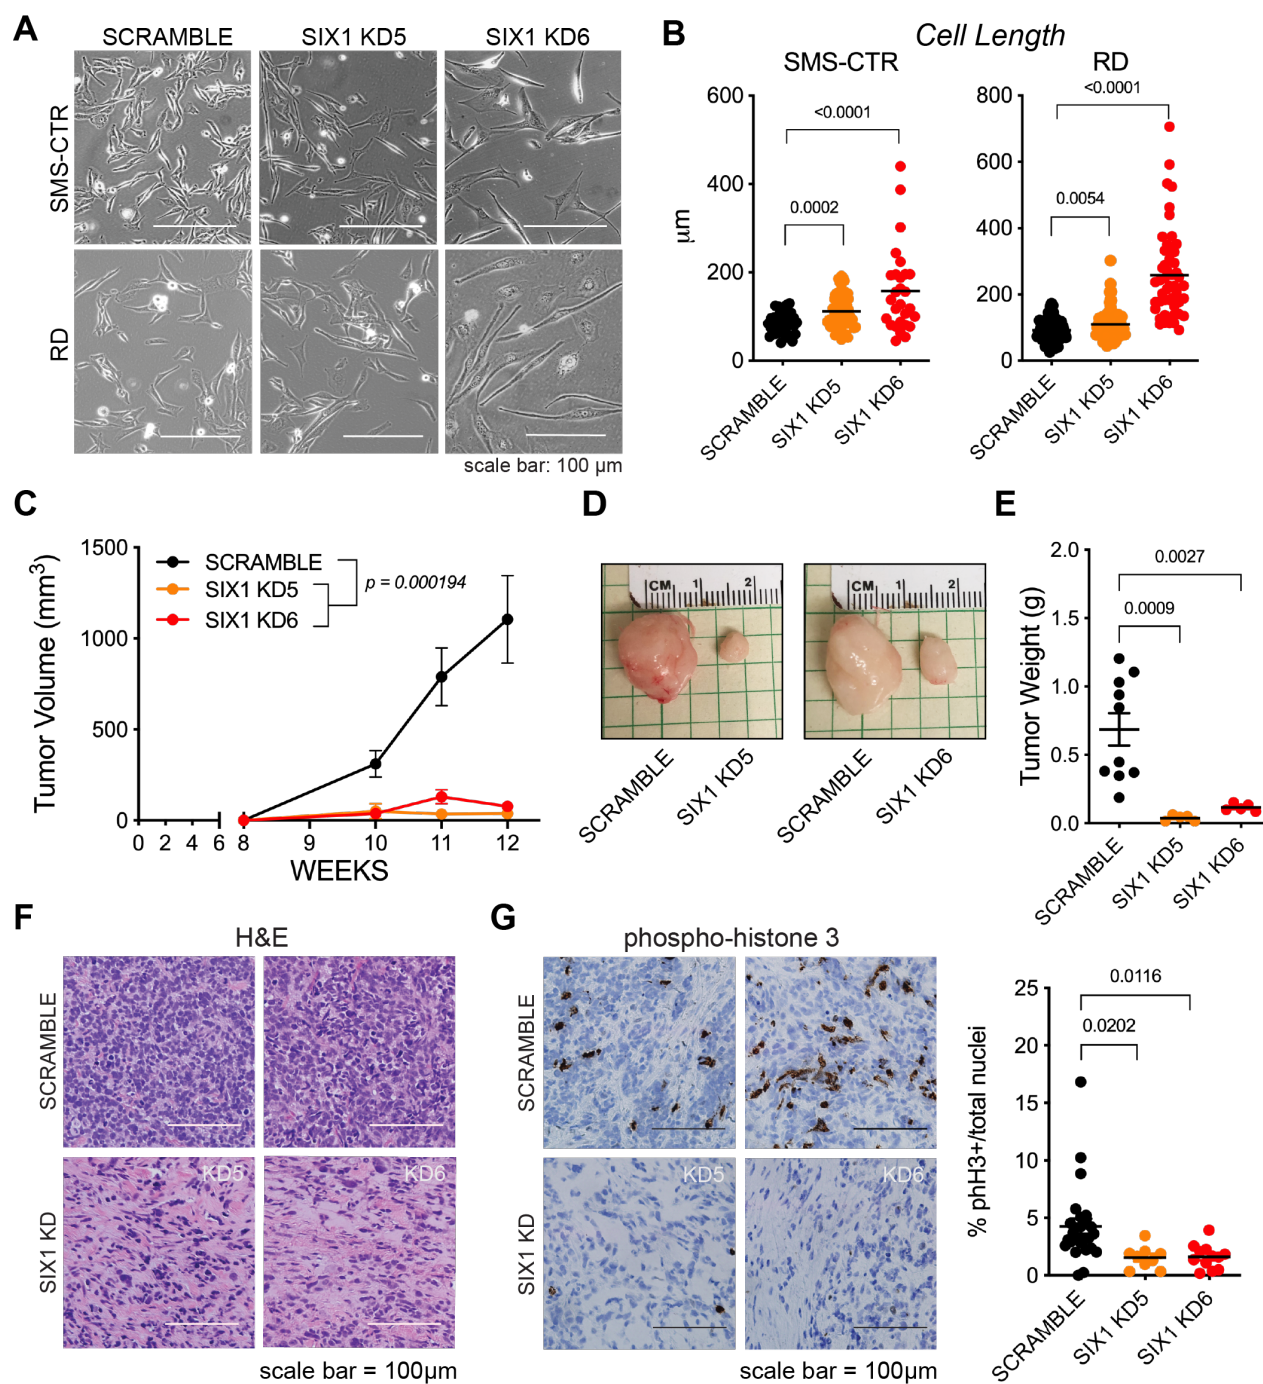

## Figure 4. SIX1 knockdown induces myogenic differentiation in RMS cells

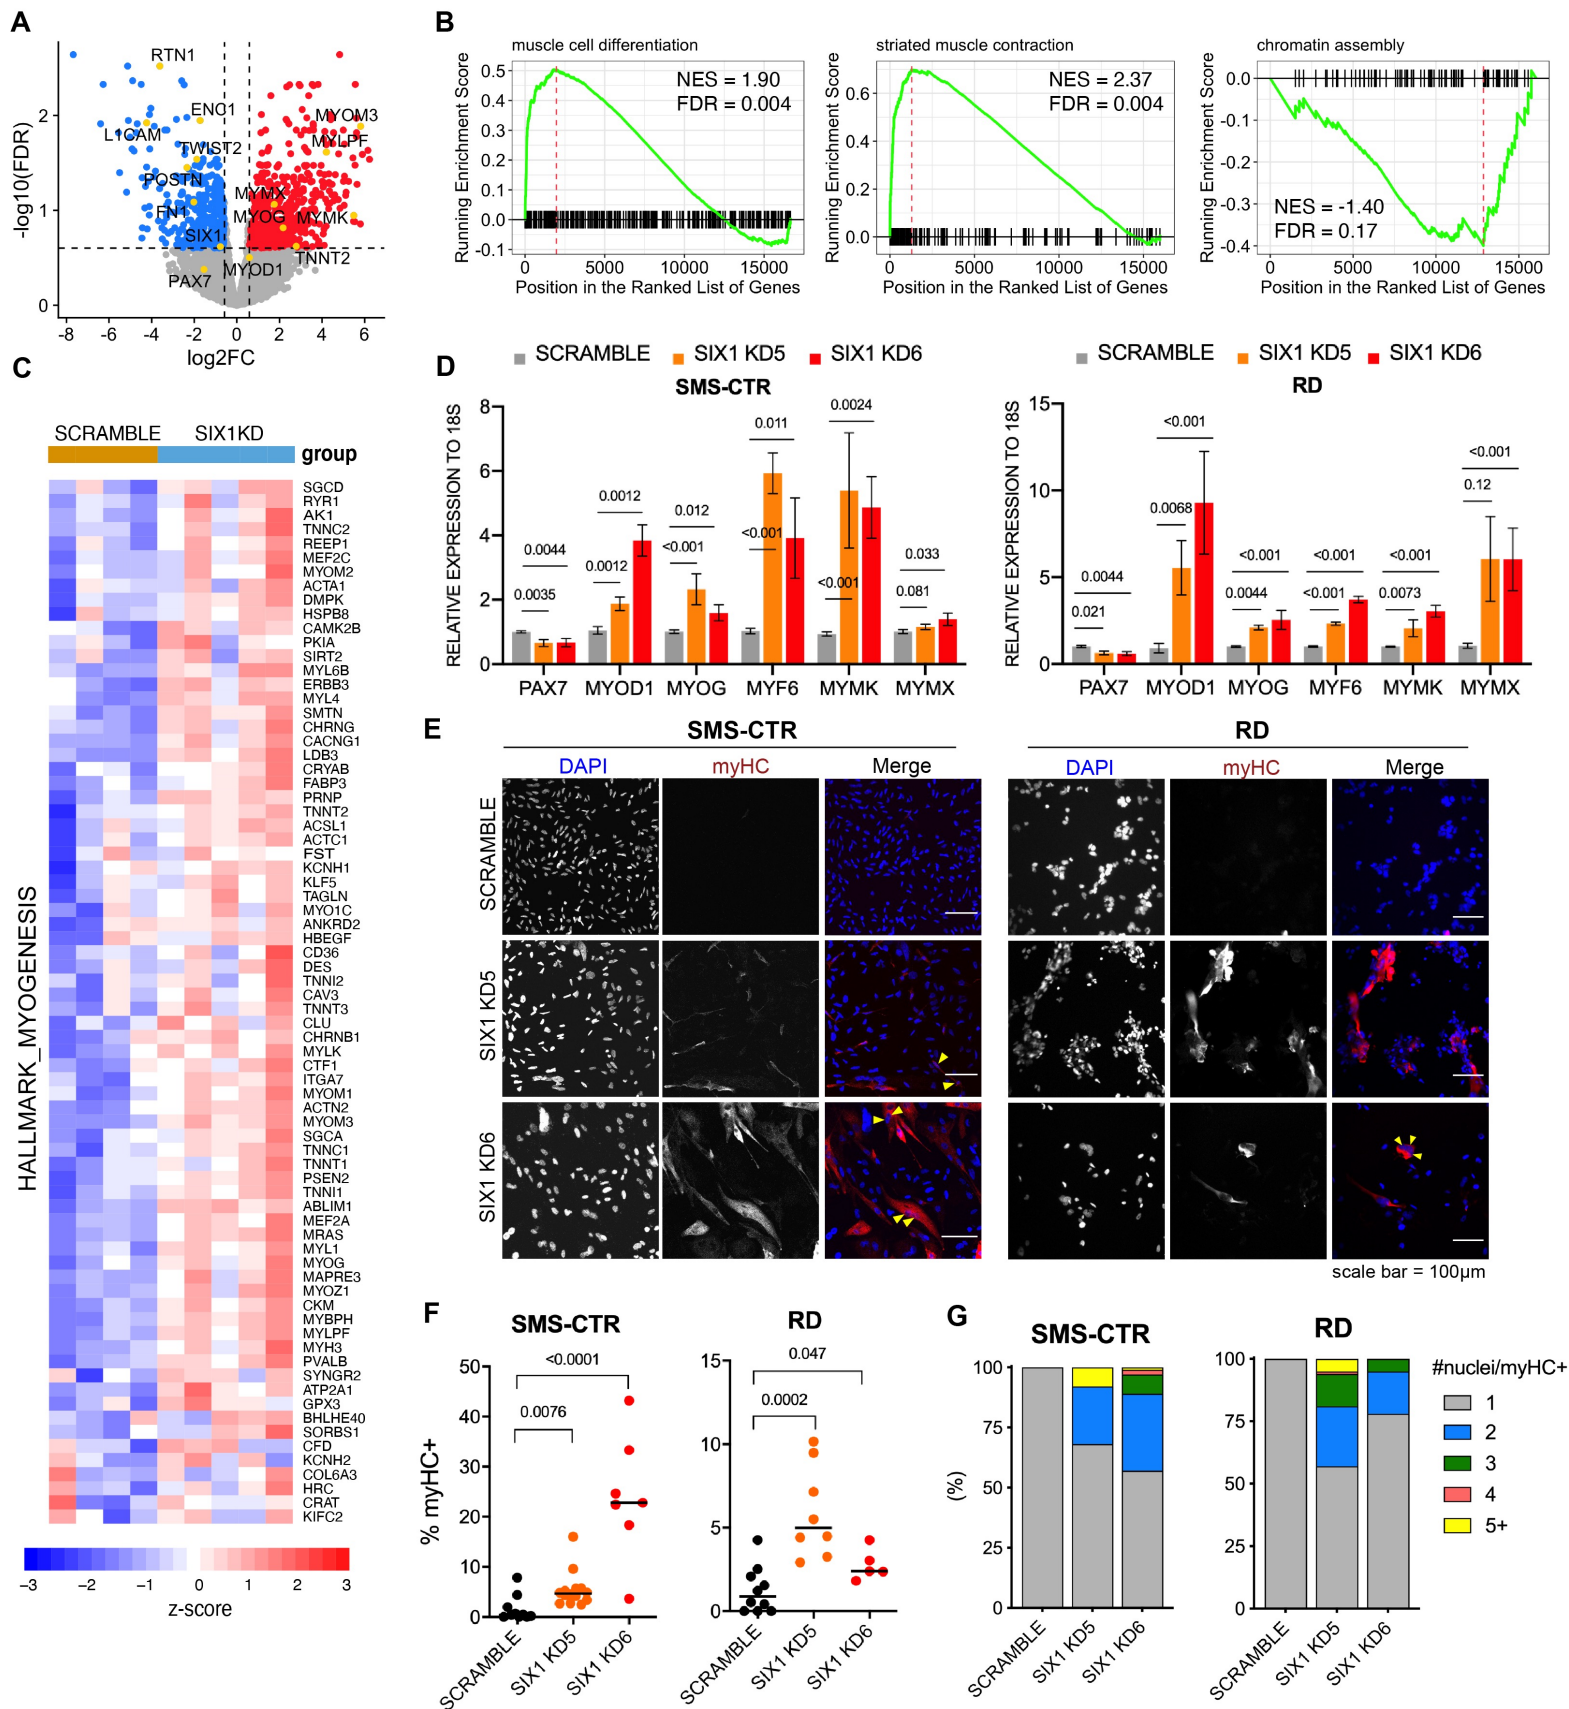

# Figure 5. SIX1 globally regulates both stem/oncogenic and myogenic differentiation genes through fine-tuning of super-enhancer activity

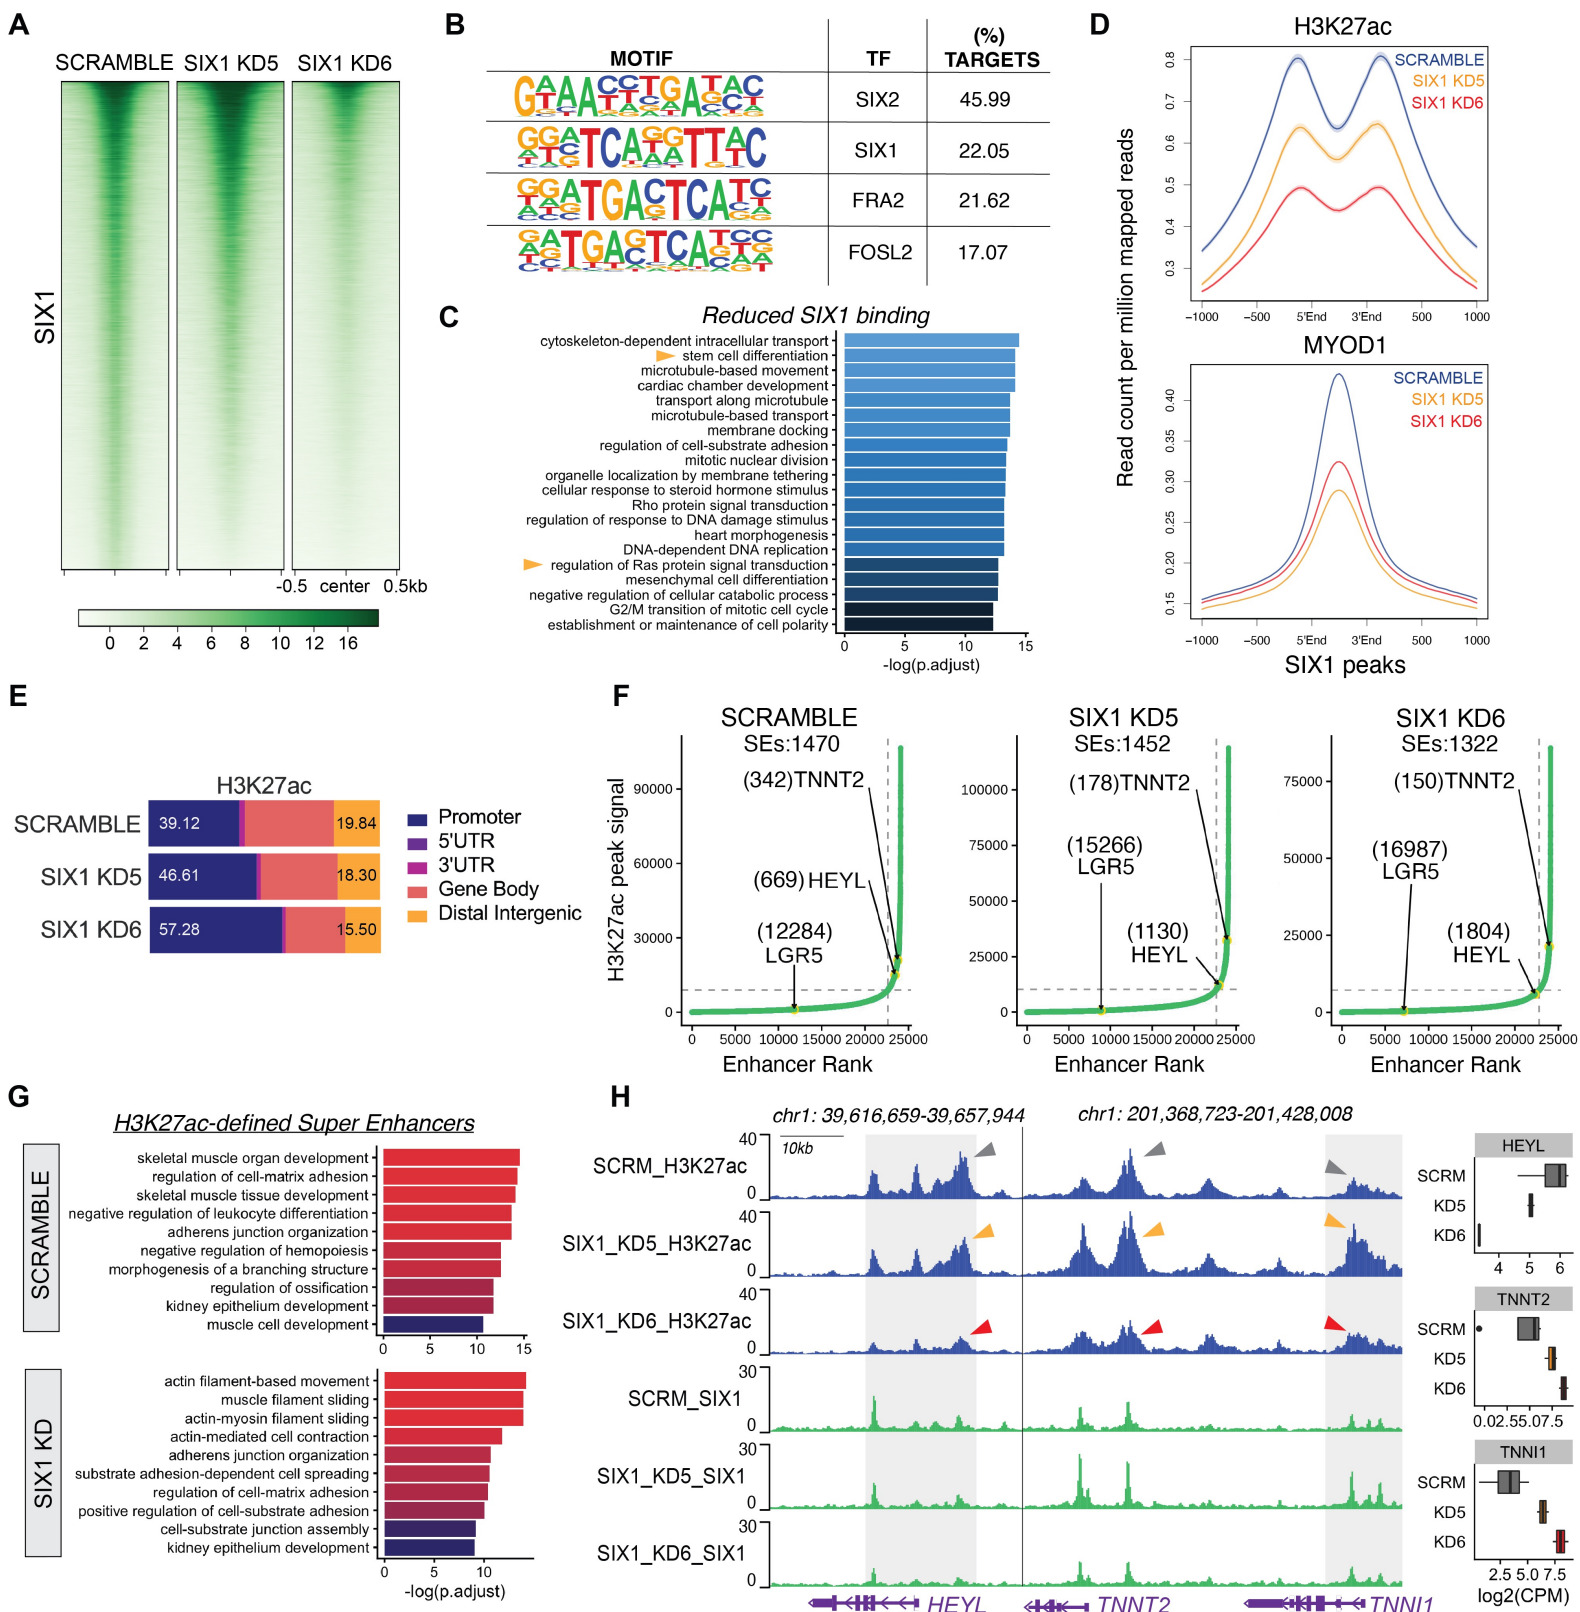



## Figure 6. SIX1 loss alters MYOD1 occupancy at muscle differentiation and stem/oncogenic loci

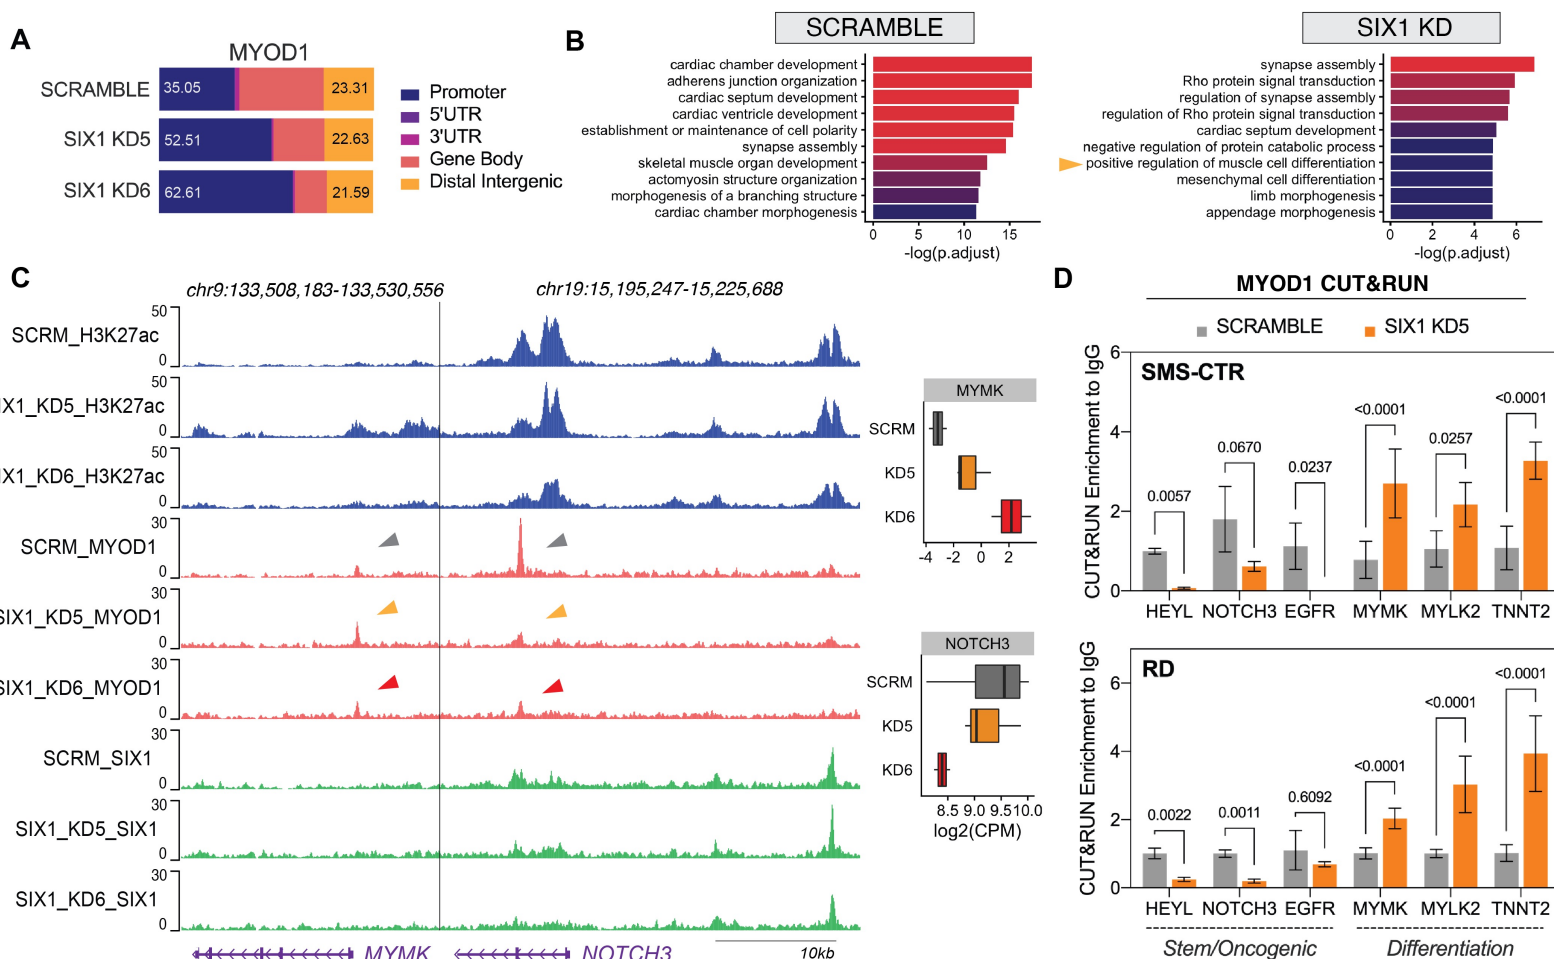

## Figure 7. SIX1 expression in RMS patients is inversely correlated with a myotube gene signature

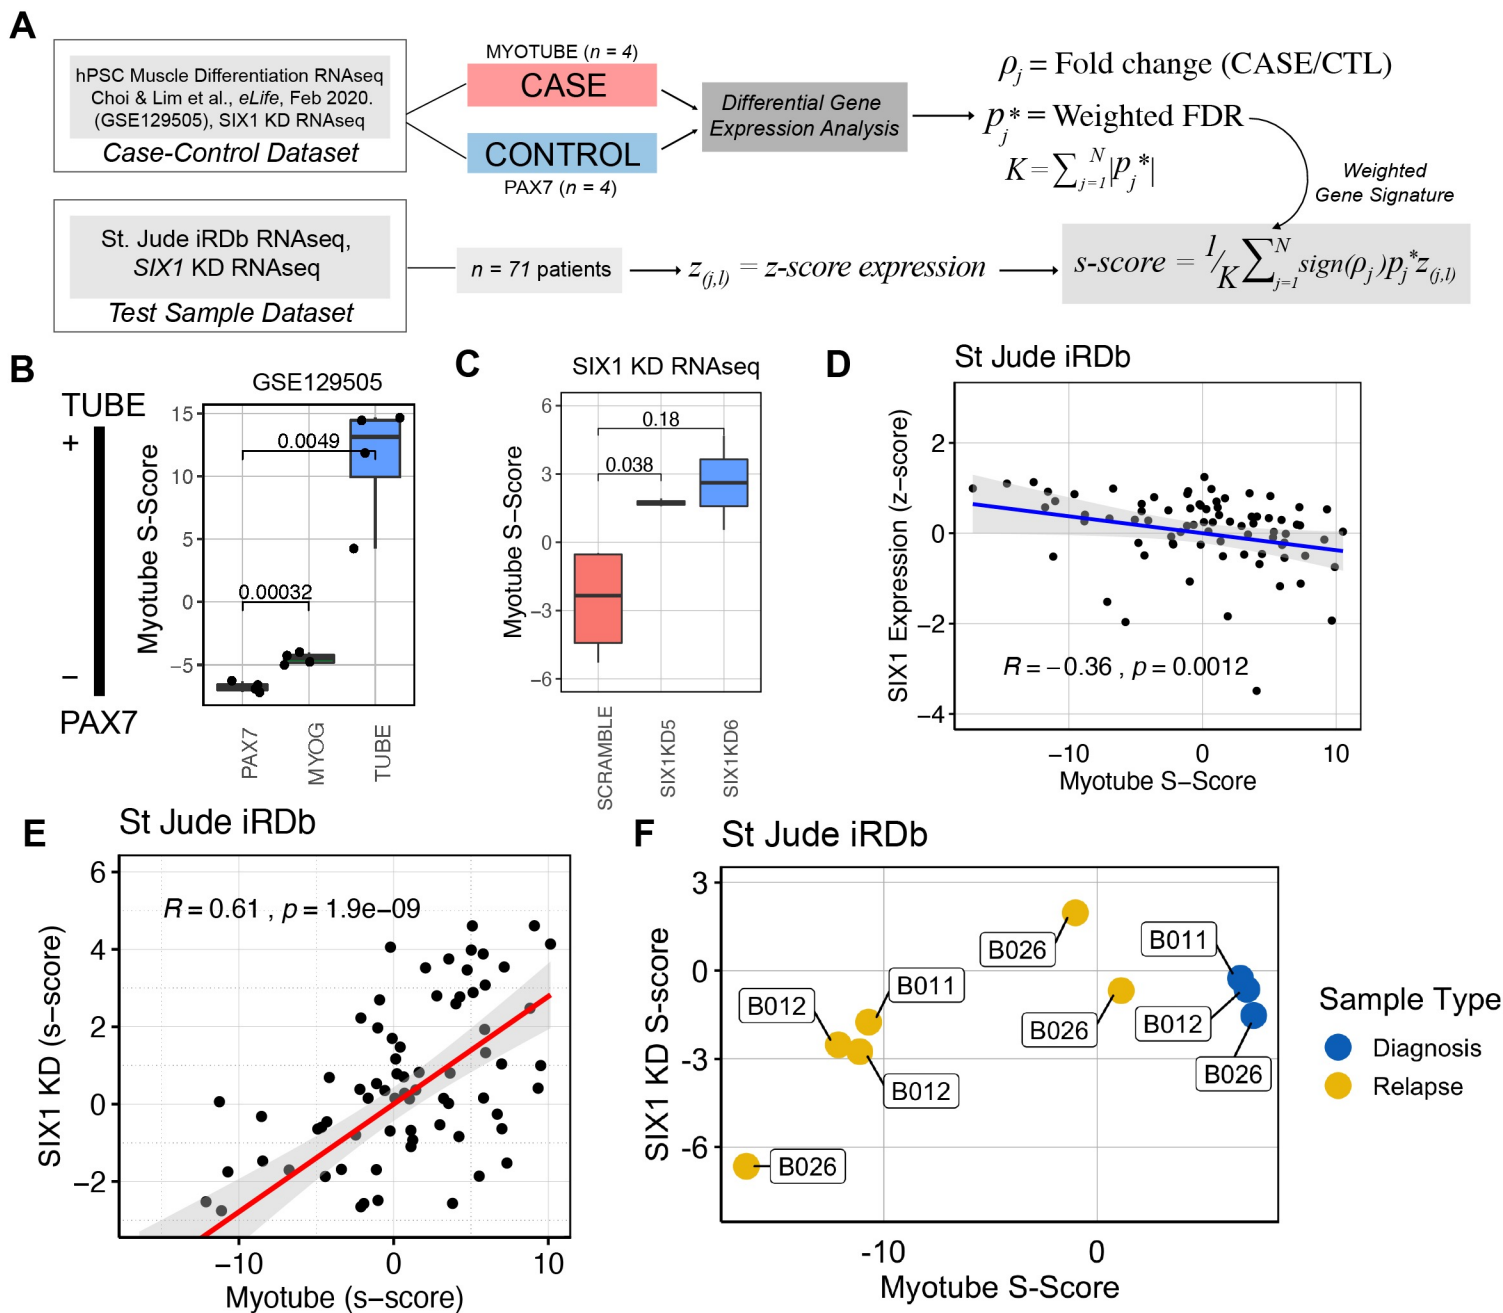

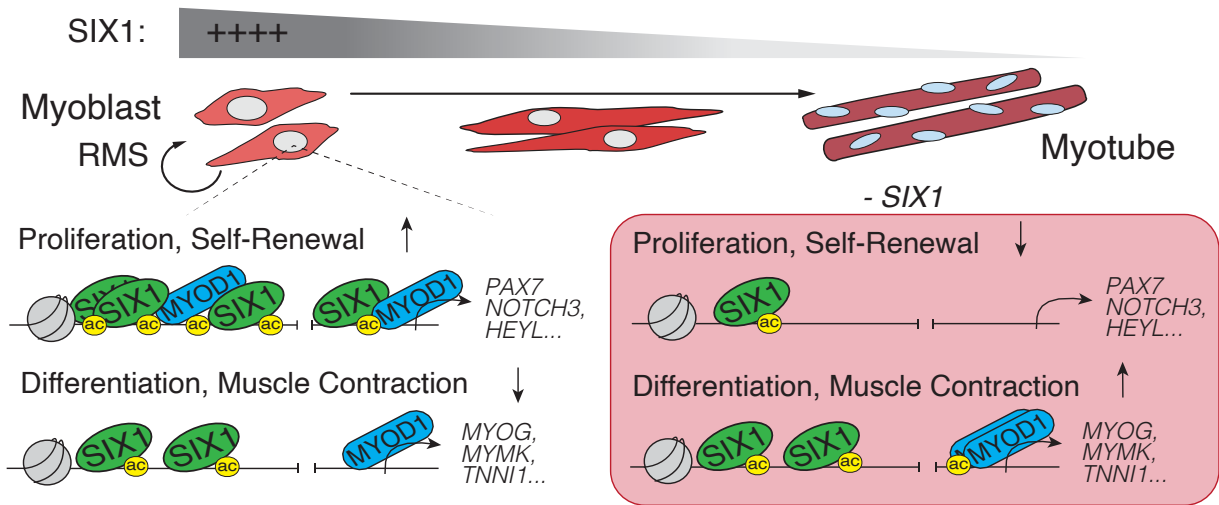

Source: http://biorxiv.org/content/10.1101/2021.04.25.439216v1.full.pdf
